# Supplementary material for: A pH responsive dendron-DNA-protein hybrid supramolecular system
Source: Royal Society of Chemistry journal article supplement (doi:10.1039/c002377a), 2010-01-01

## **A pH Responsive Dendron-DNA-Protein Hybrid Supramolecular System**

Ping Chen<sup>a</sup>, Yawei Sun<sup>b</sup>, Huajie Liu<sup>b</sup>, Lijin Xu\*<sup>a</sup>, Qinghua Fan<sup>c</sup> and Dongsheng Liu\*<sup>b</sup>

<sup>a</sup> Department of Chemistry, Renmin University of China, Beijing 100872, China.

Email: [xulj@chem.ruc.edu.cn](mailto:xulj@chem.ruc.edu.cn).

<sup>b</sup> Key Laboratory of Organic Optoelectronics & Molecular Engineering of the Ministry of Education, Department of Chemistry, Tsinghua University, Beijing 100084, China.

Email: [liudongsheng@tsinghua.edu.cn](mailto:liudongsheng@tsinghua.edu.cn)

<sup>c</sup> Beijing National Laboratory for Molecular Sciences, CAS Key Laboratory of Molecular Recognition and Function, Institute of Chemistry, Chinese Academy of Sciences, Beijing 100190, China

## Table of Contents

|                                                                                                                    |     |
|--------------------------------------------------------------------------------------------------------------------|-----|
| 1. General Information .....                                                                                       | S3  |
| 2. Preparation of the dendrons (G1 and G2)-DNA conjugates.....                                                     | S4  |
| 3. Preparation of the dendron (G1 and G2)-DNA-STV conjugates.....                                                  | S4  |
| 4. HABA test on the biotinylated DNA-dendron conjugates to STV.....                                                | S4  |
| 5. Synthesis and Characterization of amphiphilic dendrons.....                                                     | S5  |
| 6. MALDI-TOF of dendron (G1 and G2)-DNA conjugates.....                                                            | S16 |
| 7. Characterization of G1-DNA-STV conjugate by PAGE.....                                                           | S17 |
| 8. Identification of the STV-DNA-dendron conjugates after gel purification.....                                    | S18 |
| 9. UV-Vis absorption spectra of the dendrons (G1 and G2) and Gn-DNA conjugates.....                                | S19 |
| 10. Spectral results from the titration of HABA-STV complex with biotinylated Gn-DNA.....                          | S20 |
| 11. Characterization of the STV-(DNA-G1) <sub>4</sub> conjugate by CD spectroscopy.....                            | S22 |
| 12. Characterization of size change of STV-(DNA-G1) <sub>4</sub> conjugate by dynamic light scattering (DLS) ..... | S23 |
| 13. <sup>1</sup> H and <sup>13</sup> C NMR Spectra of New Compounds.....                                           | S25 |
| 14. Reference.....                                                                                                 | S54 |

## 1 General Information

The oligonucleotides were purchased from TaKaRa Biotech (Dalian, China) and HPLC purified. Streptavidin (STV) was obtained from AMRESCO. All other chemicals were purchased from Sigma-Aldrich. All buffers were prepared with ultra-pure MilliQ water (resistance  $> 18 \text{ M}\Omega\cdot\text{cm}^{-1}$ ).

Unless otherwise noted, all synthetic experiments were carried out under an inert atmosphere of dry nitrogen by using standard Schlenk-type techniques.  $^1\text{H}$  NMR and  $^{13}\text{C}$  NMR spectra were recorded on Bruker AMX 300 Spectrometer ( $^1\text{H}$ : 300 MHz;  $^{13}\text{C}$ : 75 MHz) or Bruker AMX-600 spectrometers ( $^1\text{H}$ : 600 MHz;  $^{13}\text{C}$ : 150 MHz) at 298 K using partially deuterated solvents as internal standards. Coupling constants (J) were denoted in Hz and chemical shifts ( $\delta$ ) in ppm. Multiplicities were denoted as follows: s = singlet, d = doublet, m = multiplet, br = broad. Matrix-assisted laser desorption-ionization (time of flight) (MALDI-TOF) mass spectrometry was performed on a Bruker Biflex III MOLDI-TOF spectrometer with  $\alpha$ -cyano-4-hydroxycinnamic acid (CCA) as the matrix. FAB spectra were carried out on a Bruker APEX 47E FTMS spectrometer. CD spectra were recorded on a JASCO-810 spectrometer. All the pH values mentioned were calibrated by a micro pH meter (FE 20 from METTLER TOLEDO company). UV/Vis spectra were recorded on a Varian Cary 100 spectrophotometer equipped with a programmable temperature-control unit.

Denaturing polyacrylamide gel electrophoresis (PAGE) (10% wt, Acr:Bis = 19:1, 3M Urea) was run at 20 V/cm in  $1 \times$  TBE buffer for 3 h. After the electrophoresis, the gel was stained with Stains-all dye (Sigma) or Coomassie Brilliant Blue R-250 (Fisher Biotech).

In a control experiment, the dendron G1 was synthesized, and reacted with 5'-NH<sub>2</sub>-TTCCCTAACCCCTAACCCCTT-biotin-3' to obtain DNA-G1 conjugate. Four DNA-G1 conjugates were assembled with streptavidin through noncovalent interaction to give G1-DNA-STV supramolecular system.

## 2 Preparation of the dendron (G1 and G2)-DNA conjugates.

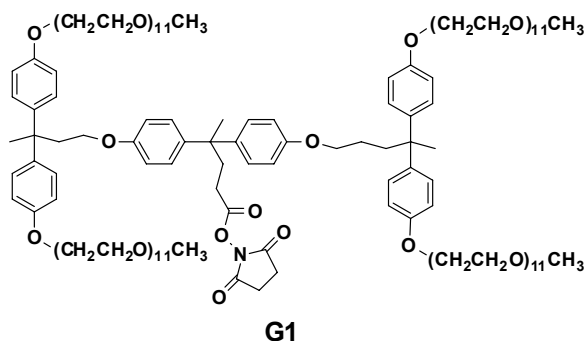

The dendron (G1 or G2) was dissolved in 75 mM pH 8.0 phosphate buffer solution and followed by adding 100  $\mu\text{M}$  5'-amino group of the biotinylated DNA with a stoichiometric molar ratio of dendron/DNA about 600:1. After incubating at room temperature for 6 h, the reaction mixture was analyzed and separated by denaturing PAGE. The resulting dendron-DNA conjugate cut off from the PAGE was dipped in water overnight, then the supernatant was desalted by ultrafiltration device (3k Da) or C18 reverse-phase column chromatograph. The final resulting product was freeze-dried to give the desired DNA-dendron conjugate. The concentration of re-dissolved conjugate was determined by measuring DNA absorbance at 260 nm using UV-Vis spectrophotometer.

## 3 Preparation of the dendron (G1 and G2)-DNA-STV conjugates

Conjugation of biotinylated DNA-dendron to streptavidin was carried out with a stoichiometric molar ratio of biotinylated DNA-dendrons/STV about 5:1 in pH 7.0 phosphate buffer at room temperature. After overnight incubation room temperature, the excess biotinylated DNA-dendrons and unreacted streptavidin were removed by denaturing PAGE. After desalting with a 10k Da MWCO ultrafiltration tube, the ultimate dendron-DNA-streptavidin conjugate could be obtained.

## 4 HABA test on the biotinylated DNA-dendron conjugates to STV

STV (AMRESCO) was dissolved in a mixture of 50 mM sodium phosphate (pH 5.0 and pH 6.2) and 150 mM NaCl at a concentration of 10  $\mu\text{M}$ ; and



**Compound 1**<sup>1</sup>: To a three-necked flask, NaH (15.0 g, 70% in oil, 400 mmol) and THF (700 mL) were placed, and then, tetraethylene glycol (77.6 g, 400 mmol) was added slowly under ice bath. The mixture was heated to reflux, and THF solution (80 mL) of benzyl chloride (12.7 g, 100 mmol) was added dropwise. The reaction mixture was stirred for 3 hrs at 100 °C, and then, it was allowed to cool at room temperature. Methanol was added to the reaction mixture to quench excess NaH, and 5 wt% aq. HCl (50 mL) was added. After evaporation of THF, the product was extracted using 5 wt% aq. HCl and CH<sub>2</sub>Cl<sub>2</sub>. The crude product (brownish liquid, 90% yield) obtained by solvent evaporation and drying under vacuum condition was used for the subsequent reaction without purification. The formation of bisbenzyl ether in ca. 10% molar ratio was observed in <sup>1</sup>H NMR analysis. <sup>1</sup>H NMR (CDCl<sub>3</sub>, 300 MHz): δ = 3.47~3.59 (m, OCH<sub>2</sub>CH<sub>2</sub>O, 16H), 4.57 (s, ArCH<sub>2</sub>O, 2H), 7.2~7.4 (m, ArH, 5H); <sup>13</sup>C NMR (CDCl<sub>3</sub>, 75MHz): δ = 138.8, 128.1, 127.5, 127.4, 72.9, 72.5, 70.4, 70.3, 70.1, 69.3, 61.3; ESI-MS calcd for C<sub>15</sub>H<sub>24</sub>O<sub>5</sub> 284.35, found 283.4(M-H<sup>+</sup>)

**Compound 2**<sup>1</sup>: Compound **1** (90% in purity, 25.0 g, 87 mmol), NaOH (14.00 g, 350 mmol), THF (80 mL), and H<sub>2</sub>O (70 mL) were put to a three-necked flask, and the mixture was cooled at 0 °C. A THF solution (100 mL) of *p*-toluenesulfonyl chloride (19.2 g, 100 mmol) was added to the mixture dropwise, and the reaction mixture was stirred for 2 hrs at 0 °C. The reaction mixture was allowed to warm at room temperature, and stirred for additional 20 hrs. The reaction mixture was poured to 5wt% aq. HCl cooled at 0 °C, and the product was extracted with CH<sub>2</sub>Cl<sub>2</sub>. The organic layer was rinsed with water, and dried with Na<sub>2</sub>SO<sub>4</sub>. The crude product obtained by solvent evaporation was purified by column chromatography (5% to 10% THF/ CH<sub>2</sub>Cl<sub>2</sub>) afforded **2** (35.0 g, 80 mmol, 92%) as a yellow oil. <sup>1</sup>H NMR (CDCl<sub>3</sub>, 300 MHz): δ = 2.38 (s, CH<sub>3</sub>Ar, 3H), 3.51~3.66 (m, OCH<sub>2</sub>CH<sub>2</sub>O, 14H), 4.09~4.12 (t, *J* = 9.45 Hz, ArOCH<sub>2</sub>, 2H), 4.52 (s, ArCH<sub>2</sub>O, 2H), 7.22~7.32 (m, ArH, 7H), 7.74~7.77 (d, *J* = 8.2 Hz, ArH, 2H); <sup>13</sup>C NMR (CDCl<sub>3</sub>, 75 MHz): δ = 144.7, 138.3, 133.0, 129.8, 128.3, 127.9, 127.6, 127.5, 73.1, 70.6, 70.5, 70.4, 69.5, 69.4, 68.6, 21.5; MALDI-TOF MS calcd for C<sub>22</sub>H<sub>30</sub>NaO<sub>7</sub>S 461.52 (M+Na<sup>+</sup>), found 460.8, C<sub>22</sub>H<sub>30</sub>O<sub>7</sub>KS

477.63 (M+K<sup>+</sup>), found 476.7.

**Compound 3**<sup>1</sup>: Following the procedure for **1**. NaH (11.3 g, 70% in oil, 300 mmol), tetraethylene glycol (58.2 g, 300 mmol), **2** (32.8 g, 75 mmol), and THF (500 mL) yielded **3** as yellow oil (29.0 g, 63 mmol, 84%) after purification by flash column chromatography. <sup>1</sup>H NMR (CDCl<sub>3</sub>, 300 MHz): δ = 3.54~3.69 (m, OCH<sub>2</sub>CH<sub>2</sub>O, 32H), 4.54 (s, ArCH<sub>2</sub>O, 2H), 7.23~7.34 (m, ArH, 5H); <sup>13</sup>C NMR (CDCl<sub>3</sub>, 75MHz): δ = 138.8, 128.1, 127.5, 127.4, 72.9, 72.5, 70.4, 70.3, 70.1, 69.3, 61.3; MALDI-TOF MS calcd for C<sub>23</sub>H<sub>40</sub>NaO<sub>9</sub> 483.55 (M+Na<sup>+</sup>), found 482.9, C<sub>23</sub>H<sub>40</sub>KO<sub>9</sub> 499.66 (M+K<sup>+</sup>), found 498.9

**Compound 4**<sup>1</sup>: Following the procedure for **2**, **3** (27.6 g, 60 mmol), NaOH (8.40 g, 210 mmol), *p*-toluenesulfonyl chloride (14.3 g, 75 mmol), and THF (50 mL), H<sub>2</sub>O (50 mL) yielded **4** as yellow oil (33.2 g, 54.0 mmol, 90%) after purification by flash column chromatography. <sup>1</sup>H NMR (CDCl<sub>3</sub>, 300 MHz): δ = 2.41 (s, CH<sub>3</sub>Ar, 3H), 3.53~3.67 (m, OCH<sub>2</sub>CH<sub>2</sub>O, 30H), 4.10~4.13 (t, *J* = 9.32 Hz, ArOCH<sub>2</sub>, 2H), 4.53 (s, ArCH<sub>2</sub>O, 2H), 7.22~7.32 (m, ArH, 7H), 7.75~7.78 (d, *J* = 8.29 Hz, ArH, 2H); <sup>13</sup>C NMR (CDCl<sub>3</sub>, 75 MHz): δ = 144.7, 138.3, 132.9, 129.8, 128.2, 127.8, 127.6, 127.4, 73.0, 70.5, 70.4, 70.4, 70.4, 69.4, 69.3, 68.5, 21.5; MALDI-TOF MS calcd for C<sub>30</sub>H<sub>46</sub>NaO<sub>11</sub>S 637.73 (M+Na<sup>+</sup>), found 637.0, C<sub>30</sub>H<sub>46</sub>O<sub>11</sub> KS 653.84 (M+K<sup>+</sup>), found 653.0

**Compound 5**: Following the procedure for **1** NaH (1.7 g, 50 mmol, 70% in oil), triethylene glycol monomethyl ether (8.2 g, 50 mmol), **4** (30.7 g, 50 mmol), and THF (300 mL) yielded **5** as yellow oil (26.4 g, 43.5 mmol, 87%) after purification by flash column chromatography. <sup>1</sup>H NMR (CDCl<sub>3</sub>, 300 MHz): δ = 3.36 (s, CH<sub>3</sub>OCH<sub>2</sub>, 3H), 3.50~3.63 (m, OCH<sub>2</sub>CH<sub>2</sub>O, 44H), 4.54 (s, ArCH<sub>2</sub>O, 2H), 7.29~7.33 (m, ArH, 5H); <sup>13</sup>C NMR (CDCl<sub>3</sub>, 75 MHz): δ = 138.3, 128.2, 127.6, 127.4, 73.1, 71.8, 70.5, 70.4, 69.4, 58.8; MALDI-TOF MS calcd for C<sub>30</sub>H<sub>54</sub>NaO<sub>12</sub> 629.73 (M+Na<sup>+</sup>), found 629.5, C<sub>23</sub>H<sub>40</sub>KO<sub>9</sub> (M+K<sup>+</sup>) 645.84, found 645.5

**Compound 6**: To an autoclave, **5** (3.10 g, 5 mmol), palladium carbon (5wt%, 200 mg), and THF (5 mL) were put, and the autoclave was sealed. H<sub>2</sub> gas (50 atm) was

introduced to the autoclave, and the reaction mixture was stirred for 12 hrs at 80 °C. The autoclave was allowed to cool at room temperature and depressurized to open. The product was obtained by filtration off palladium carbon and solvent evaporation in 98% yield as colorless solid.  $^1\text{H}$  NMR ( $\text{CDCl}_3$ , 300 MHz):  $\delta = 3.37$  (s,  $\text{CH}_3\text{OCH}_2$ , 3H), 3.38~3.73 (m,  $\text{OCH}_2\text{CH}_2\text{O}$ , 44H);  $^{13}\text{C}$  NMR ( $\text{CDCl}_3$ , 75 MHz):  $\delta = 72.5$ , 71.8, 70.5, 70.4, 70.3, 61.6, 58.9; MALDI-TOF MS calcd for  $\text{C}_{23}\text{H}_{48}\text{NaO}_{12}$  539.61 ( $\text{M}+\text{Na}^+$ ), found 539.4,  $\text{C}_{23}\text{H}_{48}\text{KO}_{12}$  ( $\text{M}+\text{K}^+$ ) 555.72, found 555.4

**Compound 7:** Following the procedure for **2. 6** (20.6 g, 40 mmol), NaOH (5.60 g, 140 mmol), *p*-toluenesulfonyl chloride (9.6 g, 50 mmol), and THF (50 mL),  $\text{H}_2\text{O}$  (50 mL) yielded **7** as yellow oil (22.8 g, 34 mmol, 85%) after purification by flash column chromatography.  $^1\text{H}$  NMR ( $\text{CDCl}_3$ , 300 MHz):  $\delta = 2.44$  (s,  $\text{CH}_3\text{Ar}$ , 3H), 3.36 (s,  $\text{CH}_3\text{OCH}_2$ , 3H), 3.36~3.68 (m,  $\text{OCH}_2\text{CH}_2\text{O}$ , 42H), 4.12~4.15 (t,  $J = 9.28$  Hz,  $\text{ArOCH}_2$ , 2H), 7.33~7.36 (d,  $J = 8.13$  Hz,  $\text{ArH}$ , 2H), 7.77~7.79 (d,  $J = 8.28$  Hz,  $\text{ArH}$ , 2H);  $^{13}\text{C}$  NMR ( $\text{CDCl}_3$ , 75 MHz):  $\delta = 144.7$ , 138.3, 133.0, 129.8, 128.3, 127.9, 127.6, 127.5, 73.1, 70.6, 70.5, 70.4, 69.5, 69.4, 68.6, 21.5; MALDI-TOF MS calcd for  $\text{C}_{30}\text{H}_{54}\text{O}_{14}\text{NaS}$  693.8 ( $\text{M}+\text{Na}^+$ ), found 693.5,  $\text{C}_{30}\text{H}_{54}\text{O}_{14}\text{KS}$  709.9 ( $\text{M}+\text{K}^+$ ), found 709.5

## 2) Synthesis of peripheral OEG-modified Dendrons:

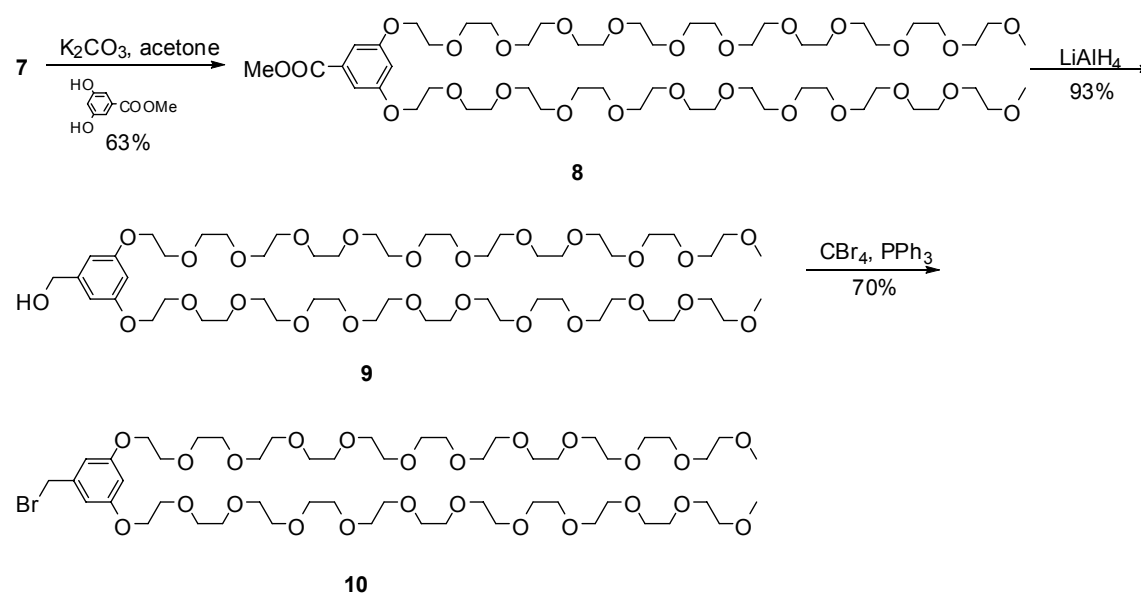

**Scheme S2.** Synthetic route to OEG Dendron



**Compound 8:** A mixture of 3, 5-dihydrobenzoate (2.35 g, 14 mmol), **7** (20.1 g, 30 mmol), and  $K_2CO_3$  (13.8 g, 100 mmol) in acetone was stirred at reflux for 16 h. The product was diluted with  $CH_2Cl_2$ , filtered, and the solvent was removed under reduced pressure. The residue was dissolved in dichloromethane (150 ml), washed with water (100 ml) and then dried over  $Na_2SO_4$ . The crude product obtained by solvent evaporation was purification by column chromatography (2% to 8% MeOH/ $CH_2Cl_2$ ) afforded Compound **8** as a yellow oil (10.2 g, 8.7 mmol, 63%).  $^1H$  NMR( $CDCl_3$ , 300 MHz):  $\delta$  = 3.36 (s,  $CH_2OCH_3$ , 6H), 3.51~3.71 (m,  $OCH_2CH_2O$  and  $COOCH_3$ , 83H), 3.84-3.87 (m,  $ArOCH_2CH_2O$ , 4H), 4.12~4.14 (m,  $ArOCH_2CH_2O$ , 4H), 6.69 (s,  $ArH$ , 1H), 7.21~7.22 (d,  $J$  = 1.88 Hz,  $ArH$ , 2H);  $^{13}C$  NMR ( $CDCl_3$ , 75 MHz):  $\delta$  = 168.2, 159.6, 131.8, 108.2, 106.9, 71.8, 70.7, 70.5, 70.4, 70.3, 69.5, 67.6, 58.9; MALDI-TOF MS calcd for  $C_{54}H_{100}NaO_{26}$  ( $M+Na^+$ ) 1188.35, found 1187.8,  $C_{54}H_{100}O_{26}K$  ( $M+K^+$ )1204.45, found 1203.8

**Compound 9:**  $LiAlH_4$  (0.42 g, 11 mmol) was added to a solution of Compound **8** (10.0 g, 8.6 mmol) in dry THF (100 mL) at 0 °C, the mixture was stirred for 10 min, warmed to room temp, and then reflux for another 45 min. The reaction was quenched by dropwise addition of saturated  $NH_4Cl$  solution. The resulting precipitate was filtered, and THF was evaporated. The residue was purification by column chromatography with (10% MeOH/ $CH_2Cl_2$ ) afforded **9** (9.09 g, 8.0 mmol, 93%) as a colorless oil.  $^1H$  NMR ( $CDCl_3$ , 300 MHz):  $\delta$  = 3.30 (s,  $ArCH_2OH$ , 1H), 3.36 (s,  $CH_3OCH_2$ , 6H), 3.53~3.70 (m,  $OCH_2CH_2O$ , 80H), 3.80~3.83 (m,  $OCH_2CH_2O$ , 4H), 4.07~4.19 (m,  $ArOCH_2$ , 4H), 4.56 (s,  $ArCH_2OH$ , 2H), 6.37 (s,  $ArH$ , 1H), 6.51~6.52 (d,  $J$  = 1.67 Hz,  $ArH$ , 2H);  $^{13}C$  NMR ( $CDCl_3$ , 75MHz):  $\delta$  = 159.9, 144.0, 105.3, 100.6, 71.8, 70.7, 70.4, 70.3, 69.6, 67.4, 64.4, 58.8; MALDI-TOF MS calcd for  $C_{53}H_{100}NaO_{25}$  1160.34 ( $M+Na^+$ ), found 1159.8,  $C_{53}H_{100}O_{25}K$  1176.44 ( $M+K^+$ ), found 1175.8

**Compound 10:** To an ice-cooled solution of Compound **9** (8.9 g, 7.8 mmol) and  $CBr_4$  (4.16 g, 12.5 mmol) in dry THF (15 ml) was added a solution of  $PPh_3$  (2.88 g, 11 mmol) in dry THF (5 ml) dropwise over 10 minutes. The resulting mixture was stirred

in ice for 10 minutes and at room temperature for 10 minutes. The solvent was removed under reduced pressure and the product was purified by column chromatography (15% to 50% THF/CH<sub>2</sub>Cl<sub>2</sub>) afford **10** (6.55 g, 5.46 mmol, 70%). <sup>1</sup>H NMR (CDCl<sub>3</sub>, 300 MHz): δ = 3.37 (s, CH<sub>3</sub>OCH<sub>2</sub>, 6H), 3.53~3.70 (m, OCH<sub>2</sub>CH<sub>2</sub>O, 80H), 3.80~3.83 (t, *J* = 9.46 Hz, OCH<sub>2</sub>CH<sub>2</sub>O, 4H), 4.07~4.10 (t, *J* = 9.51 Hz, ArOCH<sub>2</sub>, 4H), 4.39 (s, ArCH<sub>2</sub>Br, 2H), 6.41 (s, ArH, 1H), 6.54~6.55 (d, *J* = 1.15 Hz, ArH, 2H); <sup>13</sup>C NMR (CDCl<sub>3</sub>, 75 MHz): δ = 159.9, 139.5, 107.7, 101.6, 71.8, 70.7, 70.5, 70.4, 70.3, 69.5, 67.4, 58.9, 33.5; MALDI-TOF MS calcd for C<sub>53</sub>H<sub>99</sub>BrNaO<sub>25</sub> 1223.23 (M+Na<sup>+</sup>), found 1223.7, C<sub>53</sub>H<sub>100</sub>O<sub>25</sub>BrK 1239.34 (M+K<sup>+</sup>), found 1239.7

### 3) Synthesis of hydrophobic core:

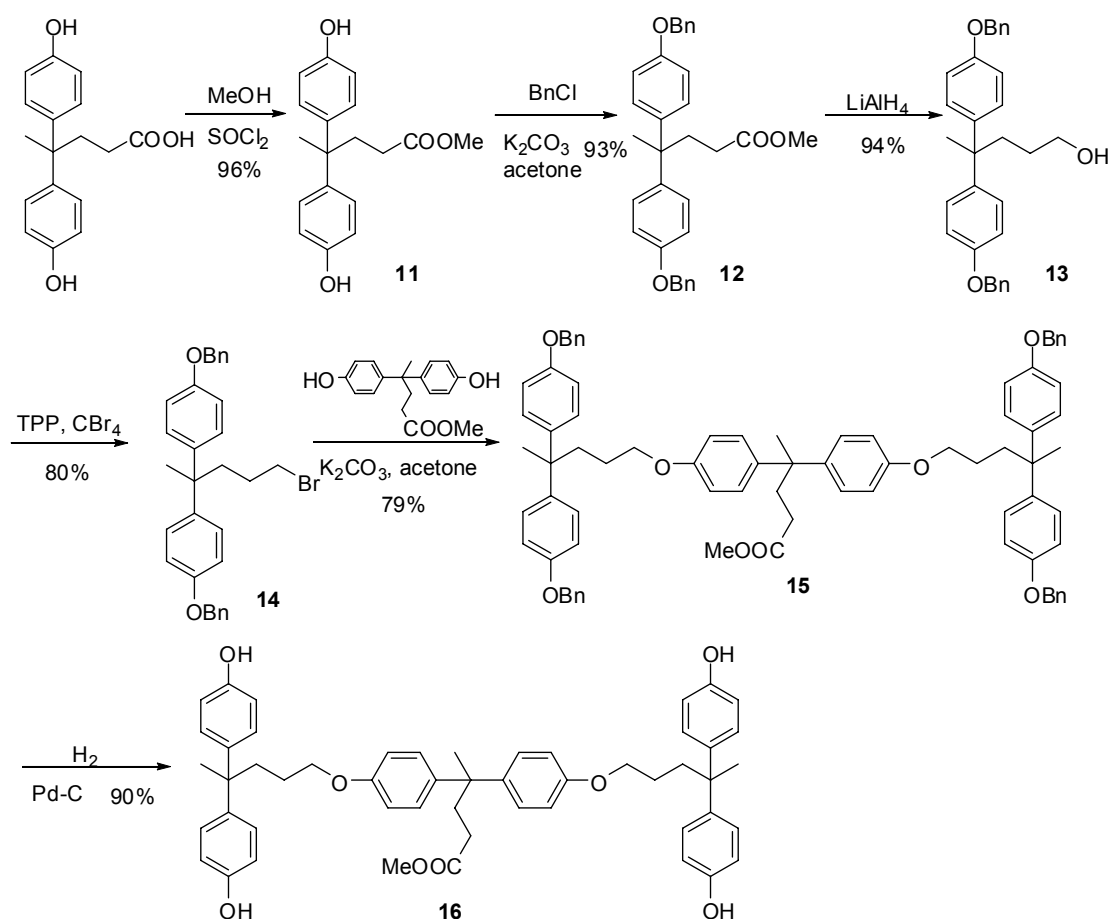

**Scheme S3.** Synthetic route to Hydrophobic Core

**Compound 11:** SOCl<sub>2</sub> (11.9 g, 100 mmol) was added dropwise to the solution of 4,4-bis (4-hydroxyphenyl) valeric acid (14.3 g, 50 mmol) in MeOH (120 ml) at

ambient temperature, the mixture was stirred for another 30 minutes. The solvent was removed under reduced pressure and the residue was recrystallized from  $\text{CH}_2\text{Cl}_2$ , white solid was obtained (14.4 g, 48 mmol, 96%).  $^1\text{H}$  NMR ( $^6\text{d}$ -Acetone, 300 MHz):  $\delta$  = 1.54 (s,  $\text{CH}_3$ , 3H), 2.05~2.12 (m,  $\text{CH}_2$ , 2H), 2.34~2.39 (m,  $\text{CH}_2$ , 2H), 3.56 (s,  $\text{COOCH}_3$ , 3H), 6.75~6.78 (d,  $J$  = 8.71 Hz, ArH, 4H), 7.02~7.05 (d,  $J$  = 8.74 Hz, ArH, 4H);  $^{13}\text{C}$  NMR ( $^6\text{d}$ -Acetone, 75 MHz):  $\delta$  = 207.5, 174.8, 156.1, 156.0, 140.9, 129.0, 115.6, 115.5, 51.7, 45.0, 37.6, 30.7, 28.1; ESI-MS calcd for  $\text{C}_{18}\text{H}_{20}\text{O}_4$ : 300.35, found 299.17(M-H<sup>+</sup>)

**Compound 12:** Following the procedure for **8**, **11** (13.5 g, 45 mmol),  $\text{BnCl}$  (12.7 g, 100 mmol), and  $\text{K}_2\text{CO}_3$  (27.6 g, 200 mmol) in acetone yielded **12** as a colorless solid (20.16 g, 42 mmol, 93%) after purification by flash column chromatography.  $^1\text{H}$  NMR ( $\text{CDCl}_3$ , 300 MHz):  $\delta$  = 1.56 (s,  $\text{CH}_3$ , 3H), 2.07~2.13 (m,  $\text{CH}_2$ , 2H), 2.37~2.43 (m,  $\text{CH}_2$ , 2H), 3.59 (s,  $\text{COOCH}_3$ , 3H), 5.00 (s,  $\text{ArOCH}_2$ , 4H), 6.85~6.88 (d,  $J$  = 8.82 Hz, ArH, 4H), 7.08~7.11 (d,  $J$  = 8.78 Hz, ArH, 4H), 7.27~7.42 (m, ArH, 10H);  $^{13}\text{C}$  NMR ( $\text{CDCl}_3$ , 75 MHz):  $\delta$  = 174.4, 156.9, 141.3, 137.2, 128.6, 128.3, 128.0, 127.6, 114.3, 70.0, 51.6, 44.6, 36.7, 30.2, 27.8; MALDI-TOF MS calcd for  $\text{C}_{32}\text{H}_{32}\text{NaO}_4$  503.58 (M+Na<sup>+</sup>), found, 502.8;  $\text{C}_{32}\text{H}_{32}\text{K O}_4$  519.69 (M+K<sup>+</sup>), found 518.8

**Compound 13<sup>2</sup>:** Following the procedure for **9**.  $\text{LiAlH}_4$  (1.9 g, 50 mmol) in THF (15 mL) and **13** (19.2 g, 40 mmol) in THF (100 mL) yielded **12** (17.0 g, 37.6 mmol, 94%) as viscous liquid.  $^1\text{H}$  NMR ( $\text{CDCl}_3$ , 300 MHz):  $\delta$  = 1.52~1.57 (t,  $J$  = 14.4 Hz,  $\text{CH}_2$ , 2H), 1.80 (s,  $\text{CH}_3$ , 3H), 2.26~2.32 (m,  $\text{CH}_2$ , 2H), 2.63 (s,  $\text{CH}_2\text{OH}$ , 1H), 3.67~3.71 (m,  $\text{CH}_2$ , 2H), 5.16 (s,  $\text{ArOCH}_2$ , 4H), 7.08~7.10 (d,  $J$  = 8.75 Hz, ArH, 4H), 7.32~7.35 (d,  $J$  = 9.0 Hz, ArH, 4H), 7.47~7.62 (m, ArH, 10H);  $^{13}\text{C}$  NMR ( $\text{CDCl}_3$ , 75 MHz):  $\delta$  = 156.9, 142.4, 137.4, 128.8, 128.6, 128.1, 127.8, 114.5, 77.7, 70.1, 63.3, 44.9, 38.3, 28.4, 28.2; MALDI-TOF MS calcd for  $\text{C}_{31}\text{H}_{32}\text{NaO}_3$  (M+Na<sup>+</sup>) 475.57, found, 474.8

**Compound 14<sup>2</sup>:** Following the procedure for **10**. **13** (16.0 g, 35.4 mmol),  $\text{PPh}_3$  (16.0 g, 35.4 mmol),  $\text{CBr}_4$  (14.1 g, 42.5 mmol), and dry THF (30 mL) yielded **14** as yellow oil (14.6 g, 28.3 mmol, 80%) after purification by flash column chromatography.  $^1\text{H}$  NMR ( $\text{CDCl}_3$ , 300 MHz):  $\delta$  = 1.81~1.87 (m,  $\text{CH}_3+\text{CH}_2$ , 5H), 2.37~2.42 (m,  $\text{CH}_2$ , 2H),

3.49~3.53 (t,  $J = 12.6$ ,  $CH_2$ , 2H), 5.20(s,  $ArOCH_2$ , 4H), 7.10~7.13 (d,  $J = 8.49$  Hz,  $ArH$ , 4H), 7.32~7.35 (d,  $J = 8.50$  Hz,  $ArH$ , 4H), 7.48~7.64 (m,  $ArH$ , 10H);  $^{13}C$  NMR ( $CDCl_3$ , 75 MHz):  $\delta = 157.0, 141.9, 137.4, 128.8, 128.5, 128.2, 127.8, 114.5, 77.7, 70.2, 44.9, 40.9, 34.9, 28.7, 28.4$ ; ESI-MS calcd for  $C_{31}H_{31}BrO_2$  515.48, found, 517.3

**Compound 15:** Following the procedure for **8. 14** (10.3 g, 20 mmol), **11** (2.7 g, 9 mmol), and  $K_2CO_3$  (6.9 g, 50 mmol) in acetone yielded **15** as a colorless solid (8.30 g, 7.1 mmol, 79%) after purification by flash column chromatography.  $^1H$  NMR ( $CDCl_3$ , 300 MHz):  $\delta = 1.53\sim 1.61$  (m,  $CH_3+CH_2$ , 13H), 2.04~2.08 (m,  $CH_2$ , 2H), 2.11~2.21 (m,  $CH_2$ , 4H), 2.35~2.41 (t,  $J = 16.4$ ,  $CH_2$ , 2H), 3.60 (s,  $COOCH_3$ , 3H), 3.82~3.86 (t,  $J = 11.26$  Hz,  $CH_2O$ , 4H), 5.02 (s,  $ArOCH_2$ , 8H), 6.72~6.75 (d,  $J = 8.76$  Hz,  $ArH$ , 4H), 6.85~6.88 (d,  $J = 8.80$  Hz,  $ArH$ , 4H), 7.04~7.07 (d,  $J = 8.77$  Hz,  $ArH$ , 4H), 7.10~7.13 (d,  $J = 8.78$  Hz,  $ArH$ , 4H), 7.30~7.43 (m,  $ArH$ , 20H);  $^{13}C$  NMR ( $CDCl_3$ , 75M Hz):  $\delta = 174.38, 157.1, 156.7, 142.0, 140.9, 137.2, 128.5, 128.3, 128.2, 127.9, 127.5, 126.7, 114.2, 113.9, 70.0, 68.3, 51.5, 44.8, 44.5, 38.4, 36.7, 30.1, 27.9, 27.7, 25.0$ ; MALDI-TOF MS calcd for  $C_{31}H_{32}NaO_3$  1192.48 ( $M+Na^+$ ), found, 1191.5

**Compound 16:** Following the procedure for **6. 15** (8.0 g, 6.84 mmol), palladium carbon (5wt%, 500 mg) in THF yielded **16** as a colorless solid (5.0 g, 6.18 mmol, 90%) after purification by flash column chromatography.  $^1H$  NMR ( $CDCl_3$ , 300 MHz):  $\delta = 1.54\sim 1.57$  (m,  $CH_3+CH_2$ , 13H), 2.04~2.08 (m,  $CH_2$ , 2H), 2.16~2.21 (m,  $CH_2$ , 4H), 2.33~2.39 (t,  $J = 16.6$  Hz,  $CH_2$ , 2H), 3.55 (s,  $COOCH_3$ , 3H), 3.68 (s,  $ArOH$ , 4H), 3.86~3.90 (t,  $J = 12.2$  Hz,  $CH_2O$ , 4H), 5.02 (s,  $ArOCH_2$ , 8H), 6.72~6.75 (d,  $J = 8.76$  Hz, 4H), 7.04~7.09 (m,  $ArH$ , 12H), 6.75~6.79 (m,  $ArH$ , 12H);  $^{13}C$  NMR ( $CDCl_3$ , 75 MHz):  $\delta = 207.5, 174.8, 158.1, 155.9, 155.8, 141.8, 141.6, 129.1, 129.0, 115.6, 115.5, 114.9, 69.1, 51.8, 45.3, 45.2, 39.1, 37.5, 28.5, 28.1, 25.9$ ; MALDI-TOF MS calcd for  $C_{52}H_{56}NaO_8$  831.99 ( $M+Na^+$ ), found, 831.6



44.5, 38.4, 36.7, 30.2, 28.0, 27.9, 25.0; MALDI-TOF calcd for  $C_{144}H_{240}NaO_{52}$  2826.4 ( $M+Na^+$ ), found 2825.7,  $C_{144}H_{240}KO_{52}$  2842.5 ( $M+K^+$ ), found 2841.7

**Compound 18:** Following the procedure for **8**, **10** (2.2 g, 1.83 mmol), **16** (0.24 g, 0.3 mmol), and  $K_2CO_3$  (1.38 g, 10 mmol) in acetone yielded **21** as a colorless oil (1.41 g, 0.27 mmol, 89%) after purification by flash column chromatography.  $^1H$  NMR ( $CDCl_3$ , 600 MHz):  $\delta$  = 1.53~1.60 (m,  $CH_3+CH_2$ , 13H), 2.05~2.08 (m,  $CH_2$ , 2H), 2.16~2.17 (m,  $CH_2$ , 4H), 2.37~2.38 (m,  $CH_2$ , 2H), 3.36 (s,  $CH_3OCH_2$ , 24H), 3.52~3.71 (m,  $OCH_2CH_2O+COOCH_3$ , 323H), 3.81~3.83 (m,  $CH_2OAr$ , 20H), 4.08~4.09 (m,  $OCH_2CH_2O$ , 16H), 4.92 (s,  $ArCH_2OAr$ , 8H), 6.42 (s,  $ArH$ , 4H), 6.57~6.58 (d,  $J$  = 1.62 Hz,  $ArH$ , 8H), 6.73~6.75 (d,  $J$  = 8.7 Hz,  $ArH$ , 4H), 6.84~6.85 (d,  $J$  = 8.7 Hz,  $ArH$ , 8H), 7.05~7.06 (d,  $J$  = 8.64 Hz,  $ArH$ , 4H), 7.09~7.11 (d,  $J$  = 8.7 Hz,  $ArH$ , 8H);  $^{13}C$  NMR ( $CDCl_3$ , 150 MHz):  $\delta$  = 174.3, 160.1, 157.0, 156.6, 142.0, 140.8, 139.6, 128.3, 128.2, 114.2, 113.9, 106.0, 101.0, 71.9, 71.5, 70.8, 70.6, 70.5, 69.9, 69.7, 68.3, 67.5, 59.0, 53.7, 51.5, 44.8, 44.5, 38.4, 36.7, 30.1, 28.0, 27.9, 25.0; MALDI-TOF calcd for  $C_{264}H_{448}NaO_{104}$  5309.31 ( $M+Na^+$ ), found 5312.6,  $C_{264}H_{448}KO_{104}$  5325.42 ( $M+K^+$ ), found 5328.6

**Compound 19:** 1.62 g (0.58 mmol) **20** and 200 mg NaOH (5 mmol) was dissolved in 10 ml  $H_2O$ , the solution was stirred at reflux for 24h, 1 ml HCl (6 mol/L) was added, the product was extract with  $CH_2Cl_2$ . The organic layer was dried with  $Na_2SO_4$ , the crude product obtained by solvent evaporation was used without further purification. 1.0 g (0.36 mmol) acid and 76 mg HOSu (0.66 mmol) was dissolved in  $CH_2Cl_2$  (5 ml), 168 mg DCC (0.82 mmol) was added to the solution. The solution was stirred for 24 h. The crude product obtained by solvent evaporation was purified by column chromatography (3% to 5% MeOH/ $CH_2Cl_2$ ) afforded **19** (0.66 g, 0.23 mmol, 64%) as a colorless oil.  $^1H$  NMR ( $CDCl_3$ , 600 MHz):  $\delta$  = 1.55~1.59 (m,  $CH_3+CH_2$ , 13H), 2.16~2.19 (m,  $CH_2$ , 4H), 2.31~2.33 (m,  $CH_2$ , 2H), 2.35~2.36 (m,  $CH_2$ , 2H), 2.88 (s,  $O=C-CH_2CH_2-C=O$ , 4H), 3.37 (s,  $CH_3OCH_2$ , 12H), 3.53~3.71 (m,  $OCH_2CH_2O$ , 160H), 3.83~4.07 (m,  $OCH_2CH_2O$ , 12H), 4.06~4.08 (m,  $CH_2OAr$ , 8H), 6.74~6.76 (d,  $J$  = 8.52 Hz,  $ArH$ , 4H), 6.78~6.80 (d,  $J$  = 8.58 Hz,  $ArH$ , 8H), 7.04~7.06 (d,  $J$  = 8.46 Hz,

Supplementary Material (ESI) for Soft Matter  
This journal is (C) The Royal Society of Chemistry 2010

ArH, 4H), 7.08~7.09 (d,  $J = 8.52$  Hz, ArH, 8H);  $^{13}\text{C}$  NMR ( $\text{CDCl}_3$ , 150 MHz):  $\delta =$  69.4, 169.0, 157.2, 156.6, 141.9, 140.2, 128.2, 128.1, 114.1, 113.9, 71.9, 71.5, 70.8, 70.6, 70.6, 70.5, 70.4, 69.8, 68.3, 67.3, 61.6, 59.0, 53.7, 44.8, 44.5, 38.4, 36.3, 28.0, 27.8, 27.3, 25.6, 25.0; MALDI-TOF calcd for  $\text{C}_{147}\text{H}_{241}\text{NNaO}_{54}$  2909.45 ( $\text{M}+\text{Na}^+$ ), found 2914.3,  $\text{C}_{147}\text{H}_{241}\text{NKO}_{54}$  2925.56 ( $\text{M}+\text{K}^+$ ), found 2930.5

**Compound 20:** Following the procedure for 19, 1.41 g (0.27 mmol) 18 was hydrolysed and reacted with 45 mg HOSu (0.39 mmol) and 100 mg DCC (0.48 mmol), colorless oil (0.7 g, 0.13 mmol, 60%) after purification by flash column chromatography.  $^1\text{H}$  NMR ( $\text{CDCl}_3$ , 600 MHz):  $\delta =$  1.54~1.61 (m,  $\text{CH}_3+\text{CH}_2$ , 13H), 2.18~2.19 (m,  $\text{CH}_2$ , 4H), 2.34~2.36 (m,  $\text{CH}_2$ , 2H), 2.59~2.61 (m,  $\text{CH}_2$ , 2H), 2.82 (s,  $\text{O}=\text{C}-\text{CH}_2\text{CH}_2-\text{C}=\text{O}$ , 4H), 3.37 (s,  $\text{CH}_3\text{OCH}_2$ , 24H), 3.53~3.71 (m,  $\text{OCH}_2\text{CH}_2\text{O}$ , 320H), 3.82~3.84 (m,  $\text{OCH}_2\text{CH}_2\text{O}$ , 20H), 4.09~4.10 (m,  $\text{OCH}_2\text{CH}_2\text{O}$ , 16H), 4.93 (s,  $\text{ArCH}_2\text{O}$ , 8H), 6.43 (s, ArH, 4H), 6.58~6.59 (d,  $J = 1.62$  Hz, ArH, 8H), 6.76~6.77 (d,  $J = 8.52$  Hz, ArH, 4H), 6.84~6.86 (d,  $J = 8.52$  Hz, ArH, 8H), 7.06~7.07 (d,  $J = 8.58$  Hz, ArH, 4H), 7.11~7.12 (d,  $J = 8.52$  Hz, ArH, 8H);  $^{13}\text{C}$  NMR ( $\text{CDCl}_3$ , 150 MHz):  $\delta =$  171.9, 171.4, 169.4, 168.9, 161.0, 160.4, 160.0, 159.9, 157.1, 156.6, 141.9, 140.2, 139.5, 128.2, 128.0, 114.2, 114.0, 113.9, 105.9, 100.9, 71.9, 71.5, 71.2, 70.7, 70.6, 70.5, 70.4, 69.7, 69.6, 68.8, 68.4, 67.5, 62.9, 58.9, 53.8, 44.8, 44.5, 38.3, 27.9, 27.8, 25.5, 25.3, 24.9; MALDI-TOF calcd for  $\text{C}_{267}\text{H}_{449}\text{KNO}_{106}$  5408.46 ( $\text{M}+\text{K}^+$ ), found 5438.

## 6 MALDI-TOF of dendron(G1 and G2)-DNA conjugates

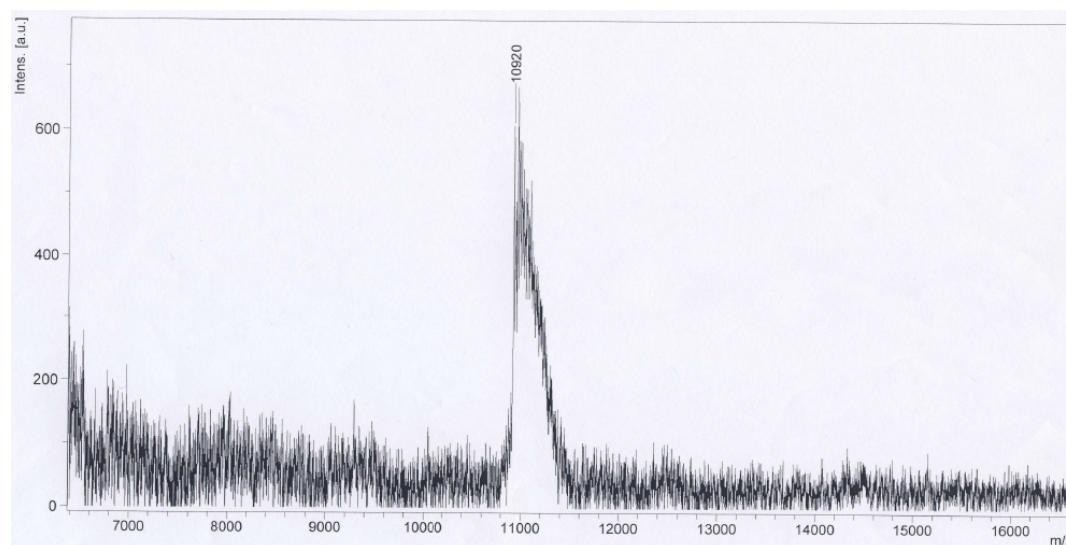

**Fig.S1** MALDI-TOF corresponding to dendron G1-DNA conjugate (calculated  $m/z$   $[M+H]^+ = 10772$ ).

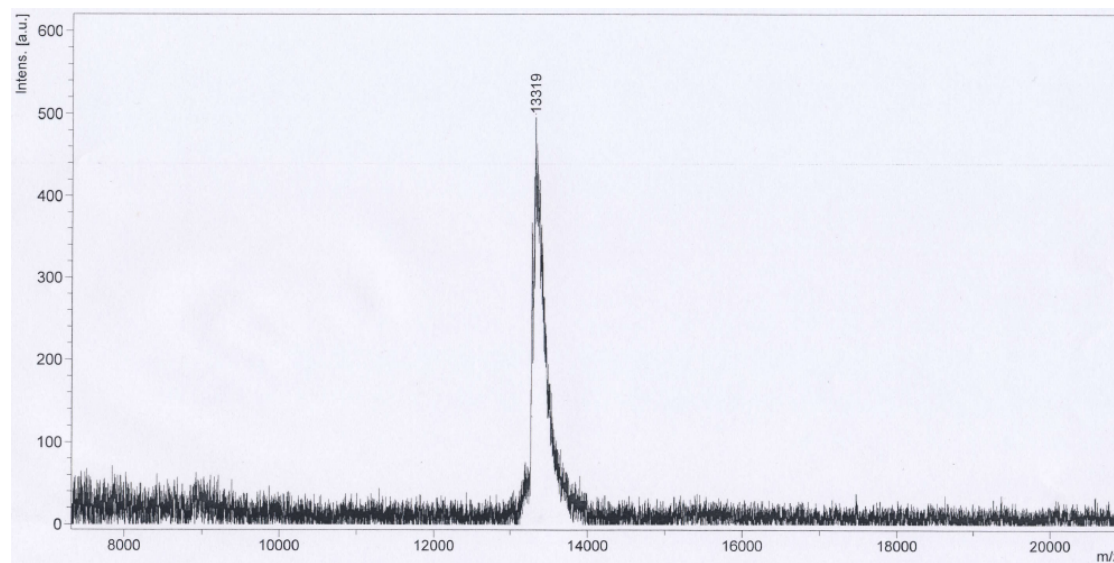

**Fig.S2** MALDI-TOF corresponding to dendron G2-DNA conjugate (calculated  $m/z$   $[M+H]^+ = 13208$ ).



## 7 Characterization of G1-DNA-STV conjugate by PAGE

The prepared biotinylated DNA-G1 conjugate was assembled with STV in a pH 7.0 phosphate buffer at room temperature for 12 hours at different molar ratio (1:1 up to 10:1), and the results were analyzed by denature PAGE (10% wt, Acr : Bis = 19:1, 3M Urea). As shown in **Fig. S3**, when the ratios lower than 4:1 were employed, several bands were observed. Along with the increase of DNA-G1 ratio in the assembling system, the yield of assemblies containing more DNA-G1 increased. When the ratio reached 4:1, only one obvious band was observed in the assembly area. No new product band was observed when we increased the ratio to 10:1.

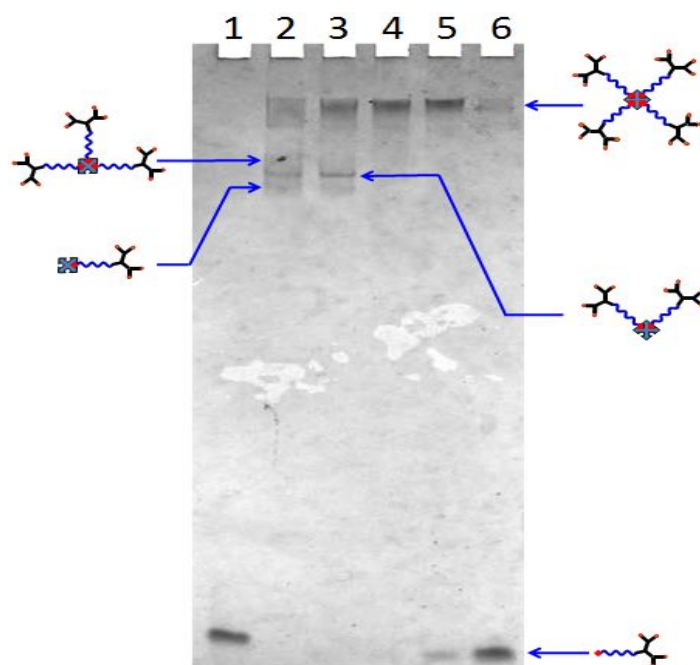

**Fig.S3** Characterization of STV and G1-DNA conjugate assembly by PAGE.  
Lane1, G1-DNA conjugate; Lane2, STV:G1-DNA=1:1; Lane3, STV:G1-DNA=1:3;  
Lane4, STV:G1-DNA=1:3; Lane5, STV:G1-DNA=1:4; Lane6, STV:G1-DNA=1:10.

## 8 Identification of the STV-DNA-dendron conjugates after gel purification

The identification of the ultimate STV-DNA-dendron conjugates after gel purification was shown in the **Fig. S4**. It is well-known that Stains-All is used for staining of nucleic acids, and Coomssie Brilliant Dyes are a family of dyes commonly used to stain proteins. As shown in **Fig. S4**, lane 4, 5 and lane 8, 9, the purified (dendron-DNA)<sub>4</sub>-STV conjugates which consist of nucleic acid and protein could be stained by both of the dyes to give one obvious band, respectively. While the DNA and dendron-DNA conjugates which only contain nucleic acids could be stained by Stains-All (**Fig. S4**, lane 1, 2, 3), but could not be stained by Coomssie Brilliant Blue (**Fig. S4**, lane 10, 11, 12). Similarly, the protein STV could only be stained by Coomssie Brilliant Blue (**Fig. S4**, lane 7), and no band could be found in the case of employing Stains-All (**Fig. S4**, lane 6). These results suggest that our hybrid supramolecular system are indeed comprised of both DNA and protein.

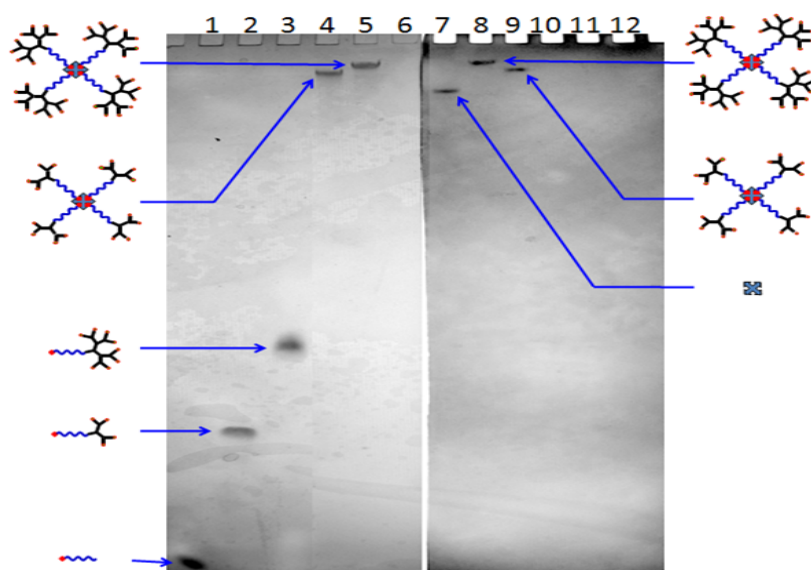

**Fig. S4** Identification of the STV-DNA-dendrons conjugates after gel purification; Lane 1-6 panels of the gel are stained with Stained All for the oligonucleotide, and Lane 7-12 panels of the gel are stained with Coomssie Brilliant Blue for the STV; Lane 1, the DNA M; Lane 2, G1-DNA; Lane 3, G2-DNA; Lane 4, STV-(DNA-G1)<sub>4</sub>; Lane 5, STV-(DNA-G2)<sub>4</sub>; Lane 6, STV; Lane 7, STV; Lane 8, STV-(DNA-G2)<sub>4</sub>; Lane 9, STV-(DNA-G1)<sub>4</sub>; Lane 10, G2-DNA; Lane 11, G1-DNA; Lane 12, the DNA M.

## 9 UV-Vis absorption spectra of the dendrons (G1 and G2) and Gn-DNA conjugates

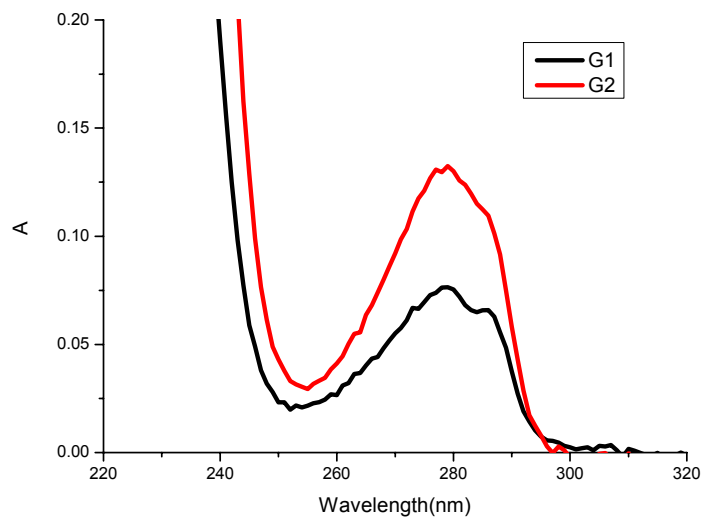

**Fig. S5** UV-Vis absorption spectra of the dendron G1 (black) and G2 (red)

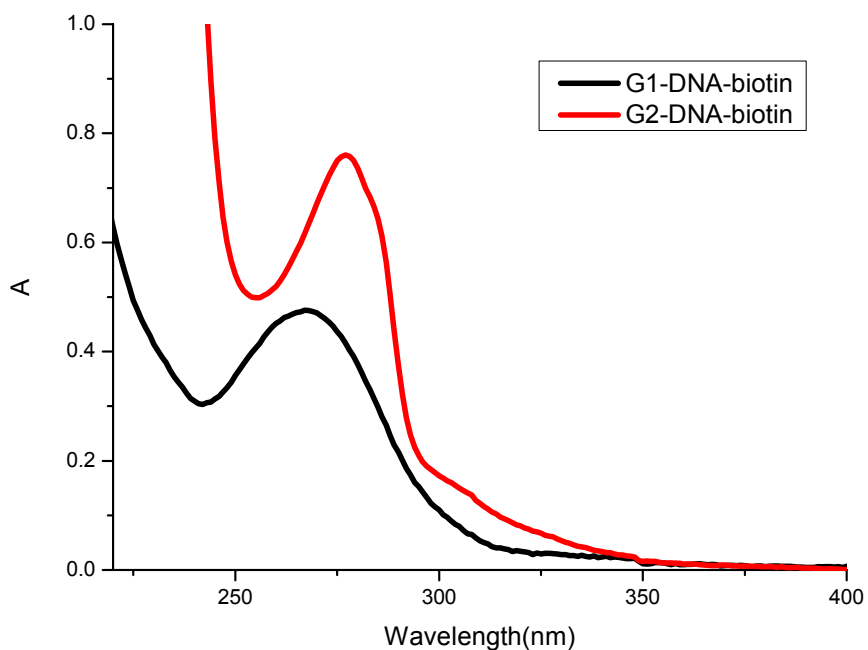

**Fig. S6** UV-Vis absorption spectra of the conjugate dendron G1-DNA (black) and G2-DNA (red).

## 10 Spectral results from the titration of HABA-STV complex with biotinylated Gn-DNA

With the HABA-STV complex in hand, we titrated it with biotinylated DNA-G1 at pH 6.2. Upon the addition of DNA-G1, an immediate decrease in the absorption at 500 nm was detected, indicative of the displacement of HABA from STV, and an increase in the absorption at 350 nm was observed which was caused by the released HABA from the HABA-STV complex (**Fig. S7**). Since the dendron G2 and G2-DNA conjugate have a larger absorption at around 300 nm (**Fig. S5 and S6**), the peak value at 350 nm during the titration by biotinylated DNA-G2 was less clear (**Fig. 4** in the manuscript). The titration required exactly four molar equivalents of DNA-G1 to STV, after which no further decrease in HABA absorbance at 500 nm was detected. These results demonstrated that the biotin unit in DNA-G1 conjugate has greater affinity to STV than HABA with the stoichiometry of 4:1. In order to examine whether the formation of i-motif could inhibit binding of the biotinylated DNA-dendron conjugates to STV, we carried out the same experiments at pH 5.0. As can be seen in **Fig. S8** and **Fig. S9**, STV could still bind DNA-G1 and DNA-G2 conjugates tightly, indicating that the steric i-motif did not hamper the formation of biotin-STV complex.

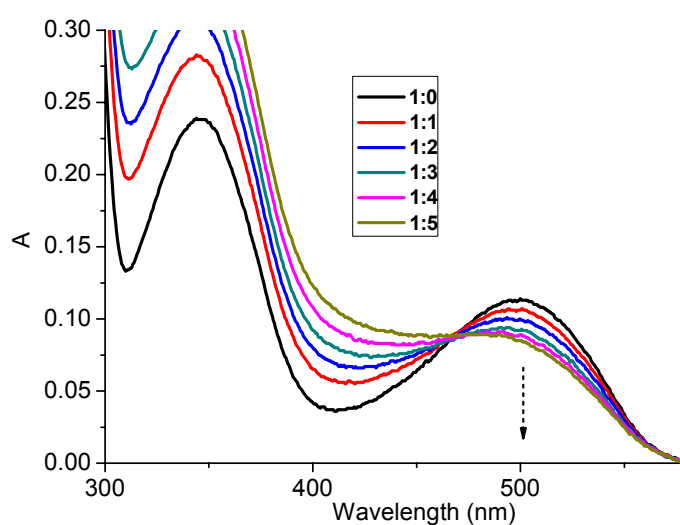

**Fig. S7** Spectral results from the titration of HABA-STV complex with biotinylated DNA-G1 at pH 6.2 resulting in HABA release and a corresponding decrease in  $A_{500}$ .

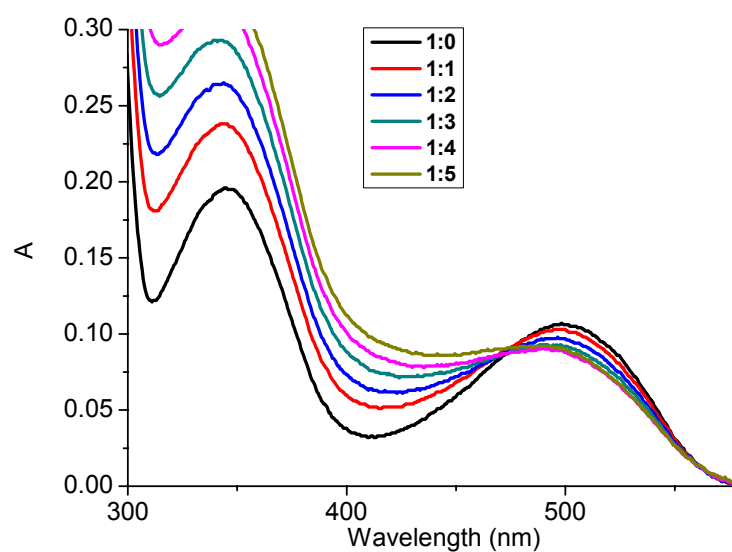

**Fig. S8** Spectral results from the titration of HABA-STV complex with biotinylated DNA-G1 at pH 5.0 resulting in HABA release and a corresponding decrease in  $A_{500}$ .

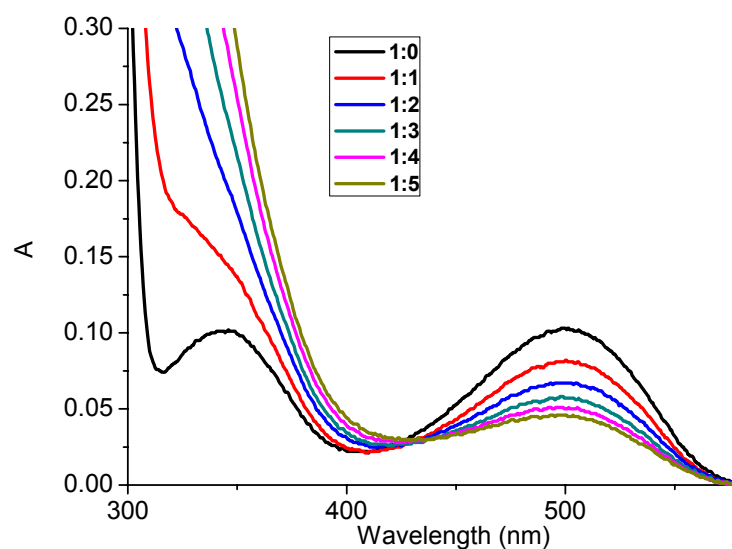

**Fig. S9** Spectral results from the titration of HABA-STV complex with biotinylated DNA-G2 at pH 5.0 resulting in HABA release and a corresponding decrease in  $A_{500}$ .

## 11 Characterization of the STV-(DNA-G1)<sub>4</sub> conjugate by CD spectroscopy

The conformational change of the (G1-DNA)<sub>4</sub>-STV conjugate associated with the folded and extended states was examined by circular dichroism (CD) spectroscopy. The (G1-DNA)<sub>4</sub>-STV conjugate (0.375  $\mu$ M) was premixed with strand Y (1.5  $\mu$ M) in pH 5.0 phosphate buffer. As shown in the **Fig. S10**, at pH 5.0 the CD spectrum showed the distinct characteristics of i-motif structure with a strong positive band near 285 nm, indicating that the system was in its folded state. While the pH value was increased to 8.0 by adding 1 M NaOH, the CD spectroscopy displayed the distinct characteristics of a B-form duplex DNA structure with a positive band near 275 nm, demonstrating the system was switched into its extended state. By adding HCl and NaOH alternatively and monitoring the amplitude of CD signal at 285 nm, the multiple cycling of the system could be achieved in a reliable manner (**Fig. S10**, inset).

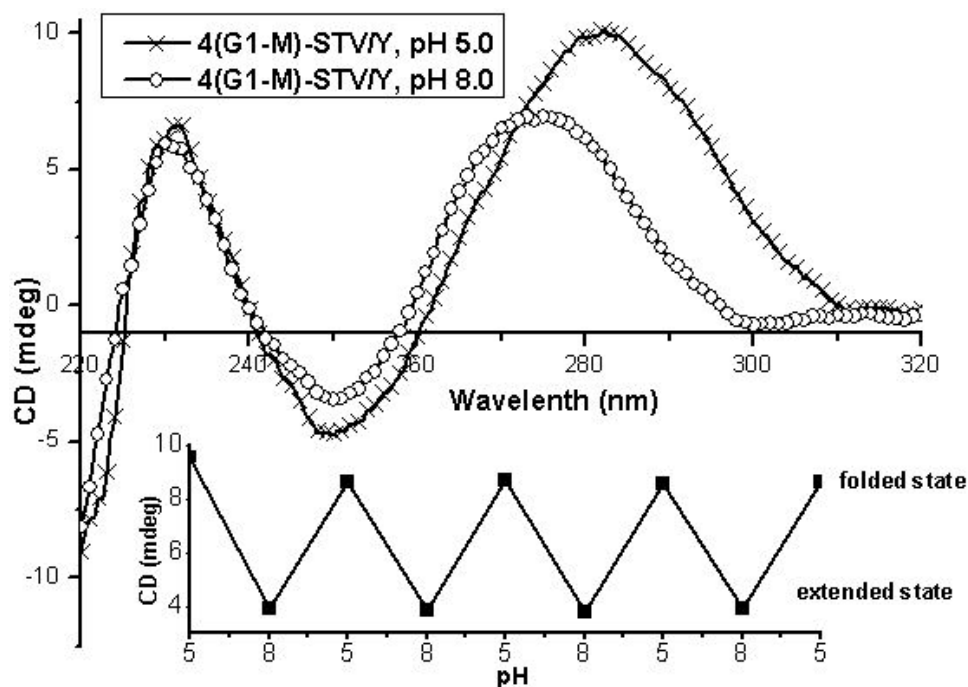

**Fig.S10** Characterization of the STV-(DNA-G1)<sub>4</sub> conjugate by CD spectroscopy. Inset: cycling of the conformational switch of STV-(DNA-G1)<sub>4</sub> conjugate through measurement of the CD signal at 285 nm between pH 5.0 and pH 8.0 by adding NaOH or HCl alternatively.

## 12. Characterization of size change of STV-(DNA-G1)<sub>4</sub> conjugate by dynamic light scattering (DLS)

Effective hydrodynamic diameter of the supramolecular system was measured by dynamic light scattering at 20 °C using a dynamic light scattering photometer (Nano ZS ZEN3600, Malvern Instruments Ltd., United Kingdom) equipped with laser at a wavelength of 633 nm. Dynamic light scattering (DLS) provides a direct measurement of the physical sizes of the sample particles. The dendrons G1(1 mM), STV(10 μM) and Dendrons-DNA-STV complex(1 μM) were respectively dissolved in the solution of 50 mM sodium phosphate (pH 5.0 and pH 8.0) and 100 mM NaCl. As shown in Fig.11, the apparent hydrodynamic diameters of dendrons and STV almost have no change at different pH. While it can be seen that in Fig. 12 the hydrodynamic volume of the G1-DNA-STV hybrid supramolecular system could be switched between the folded state and extended state, yielding effective hydrodynamic diameters of  $\sim 14.52 \pm 1.20$  nm(s.d.) at pH 5.0 and  $\sim 20.27 \pm 2.00$  nm(s.d.) at pH 8.0. The difference between the value ( $\sim 6$  nm) results from the two states controlled by conformation change of i-motif DNA.

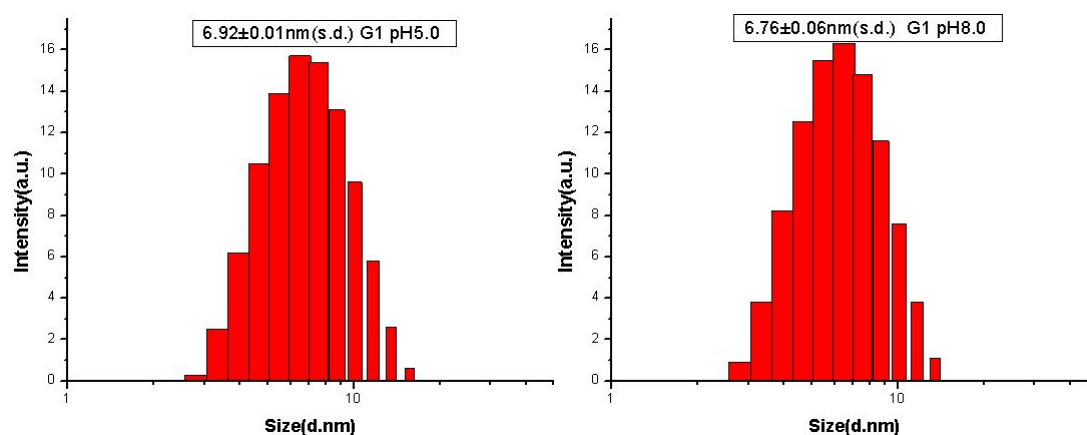

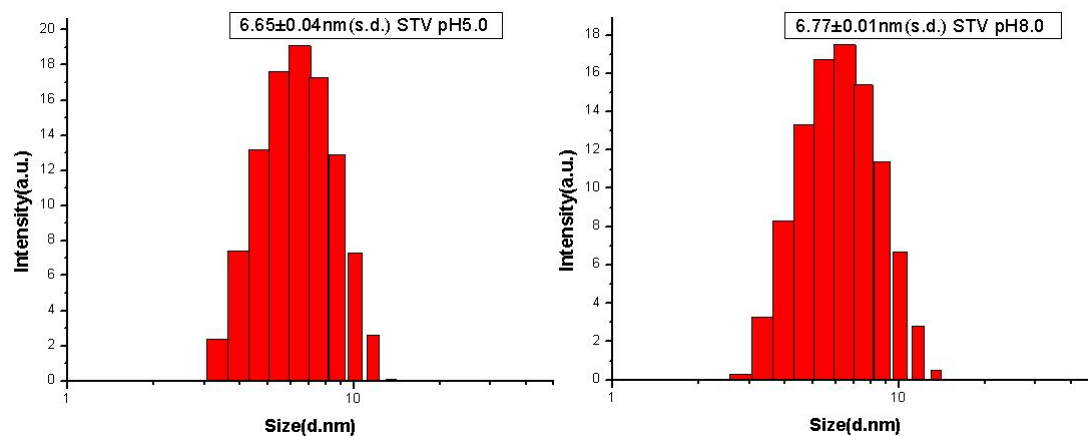

**Fig.11** Size distribution by intensity graph as a histogram of the dendrons and STV measured by DLS.

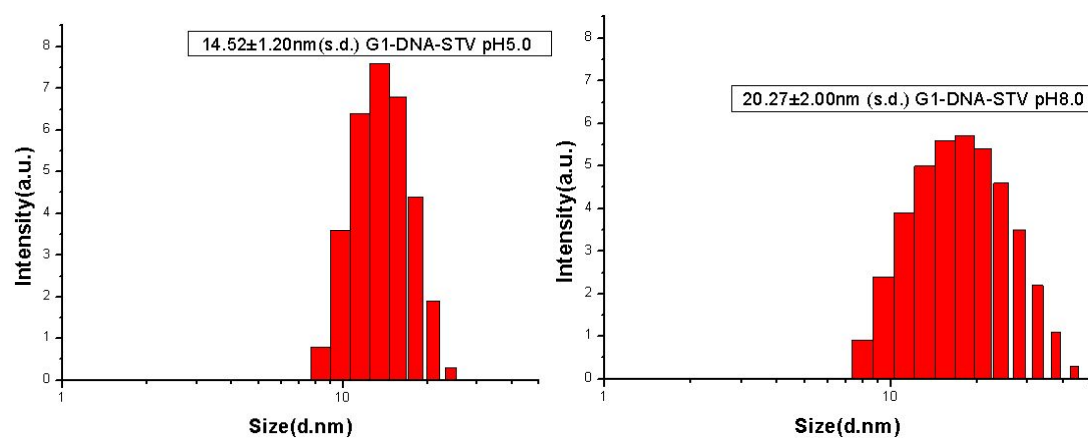

**Fig.12** Size distribution by intensity graph as a histogram of the G1-DNA-STV complex measured by DLS.



### 13 <sup>1</sup>H and <sup>13</sup>C NMR Spectra of New Compounds

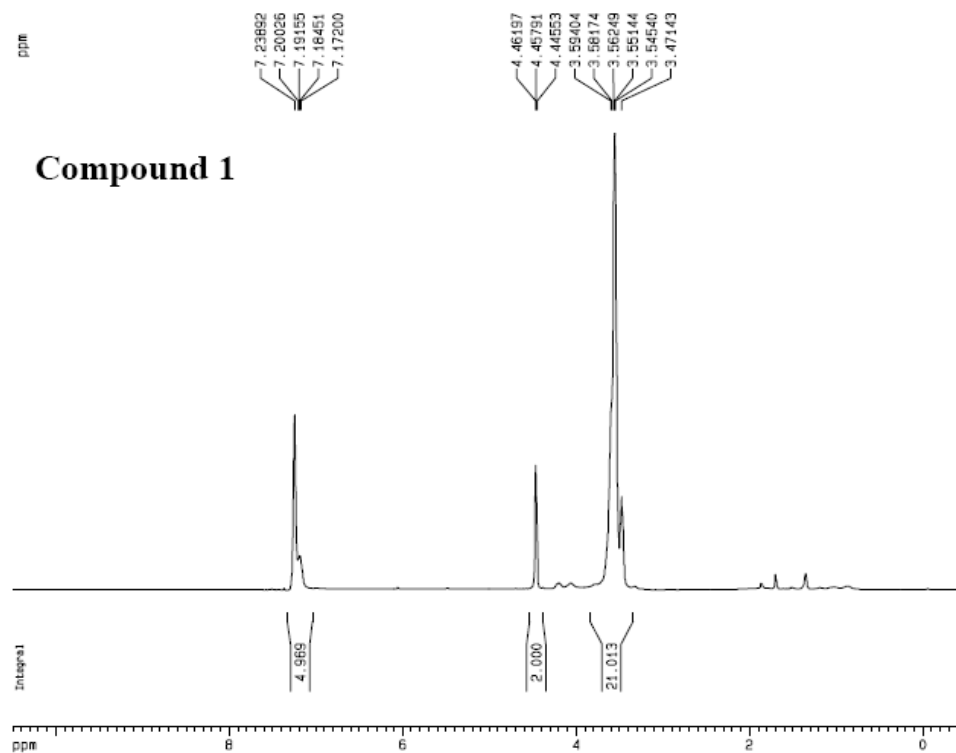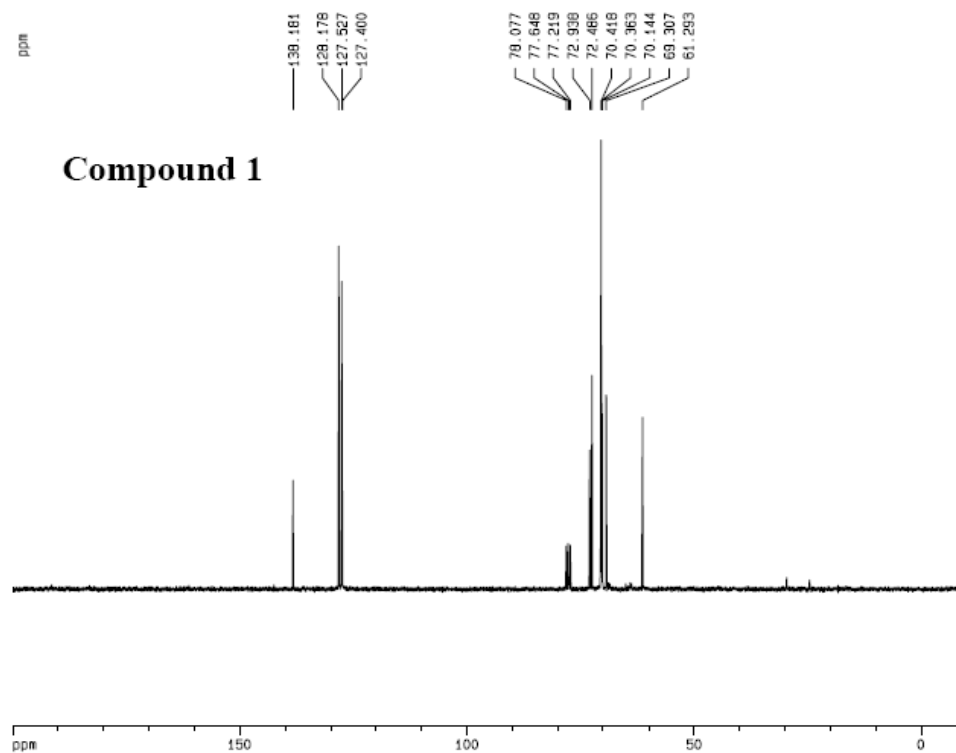

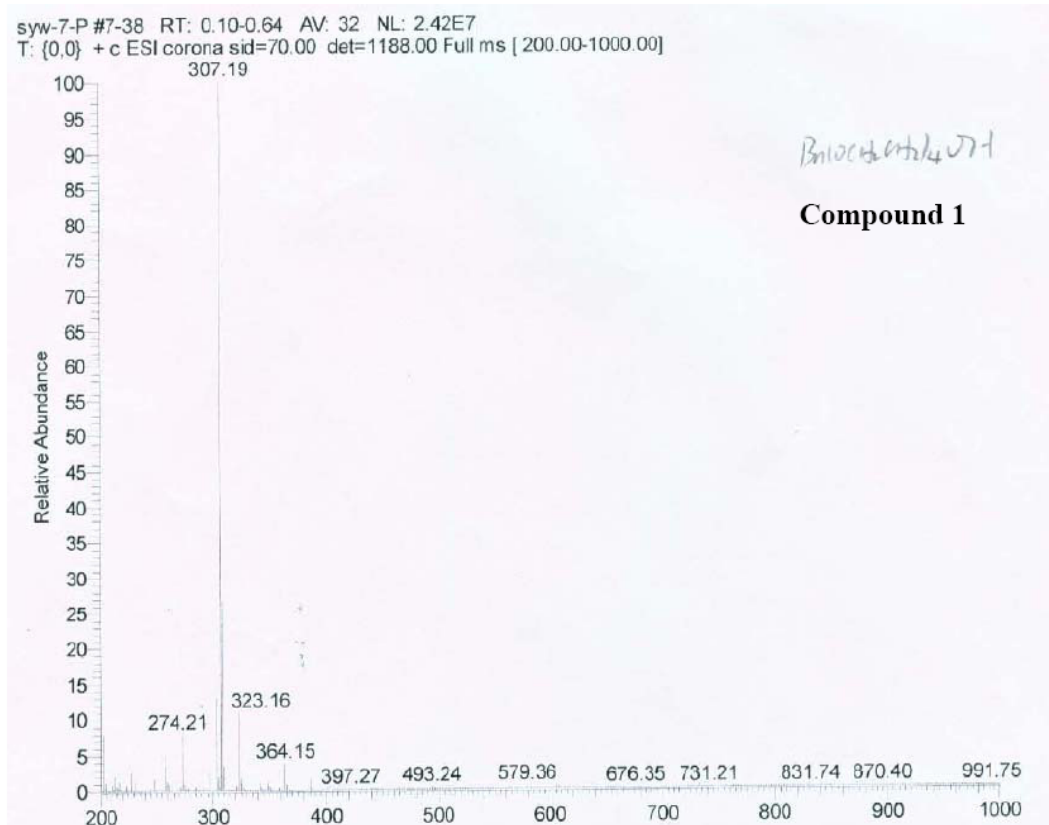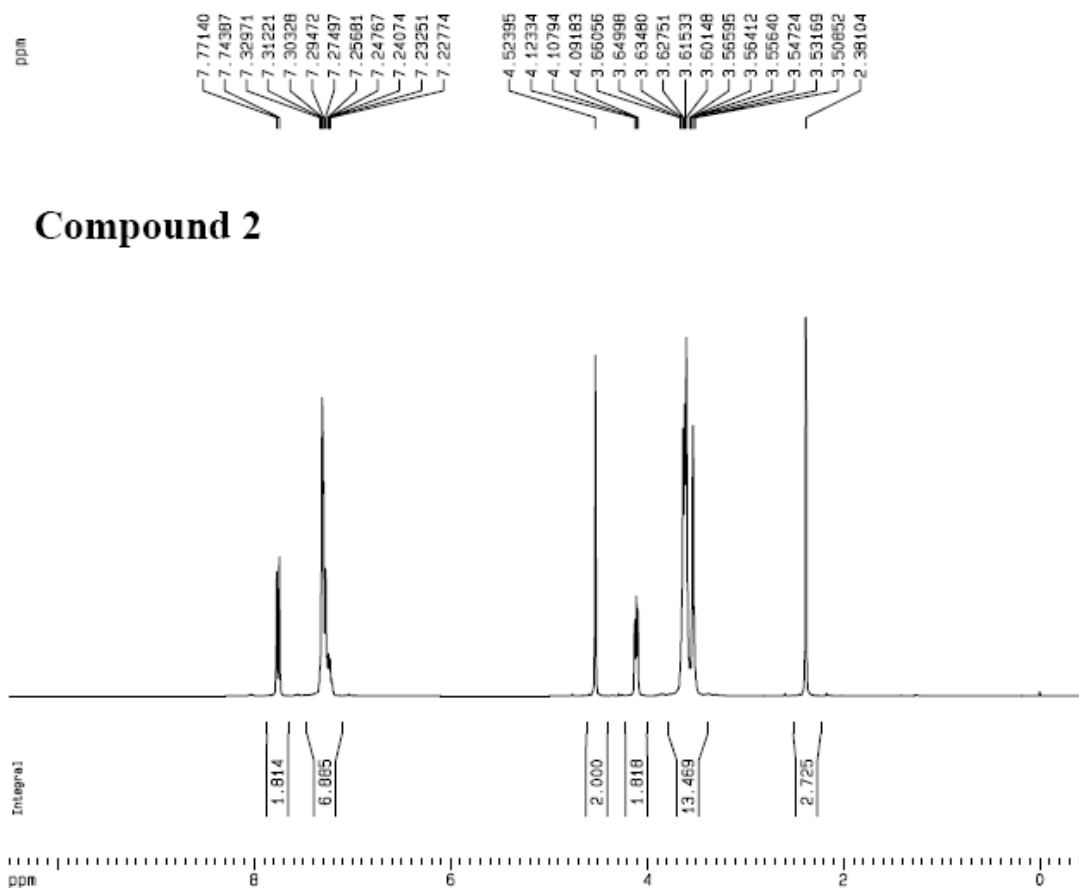

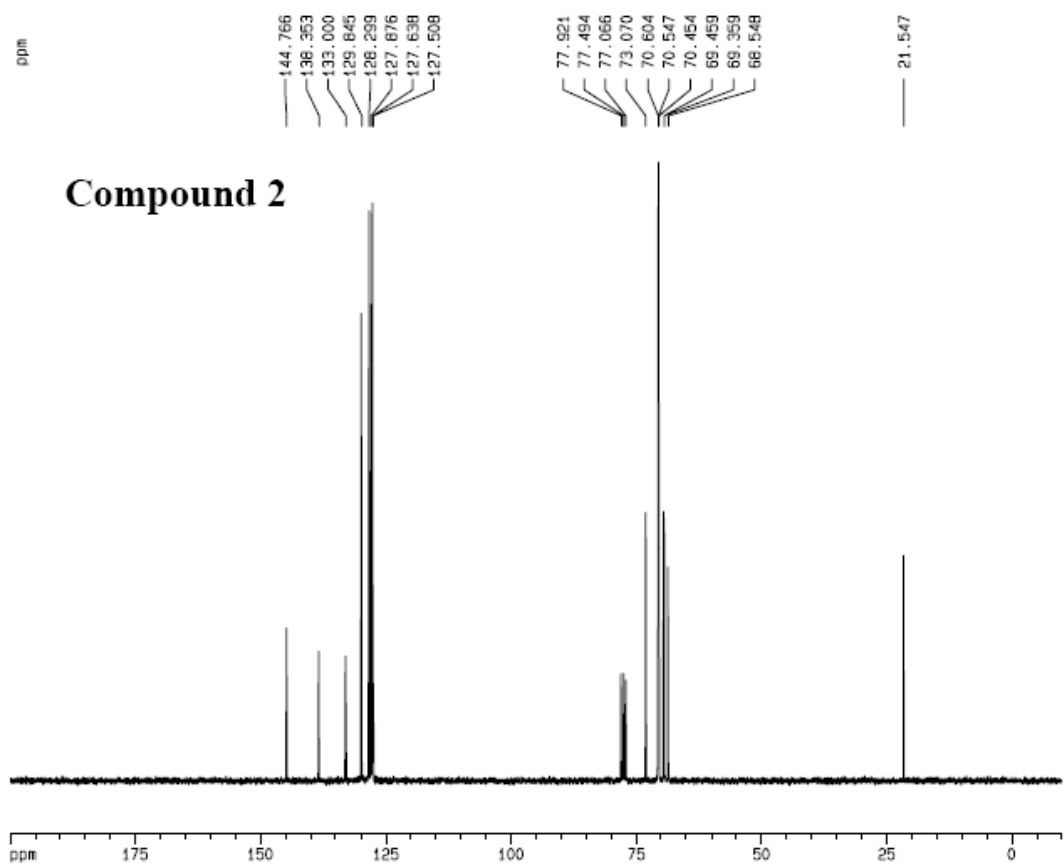

MALDI-TOF, CCA, 16, 2008, 02, 21

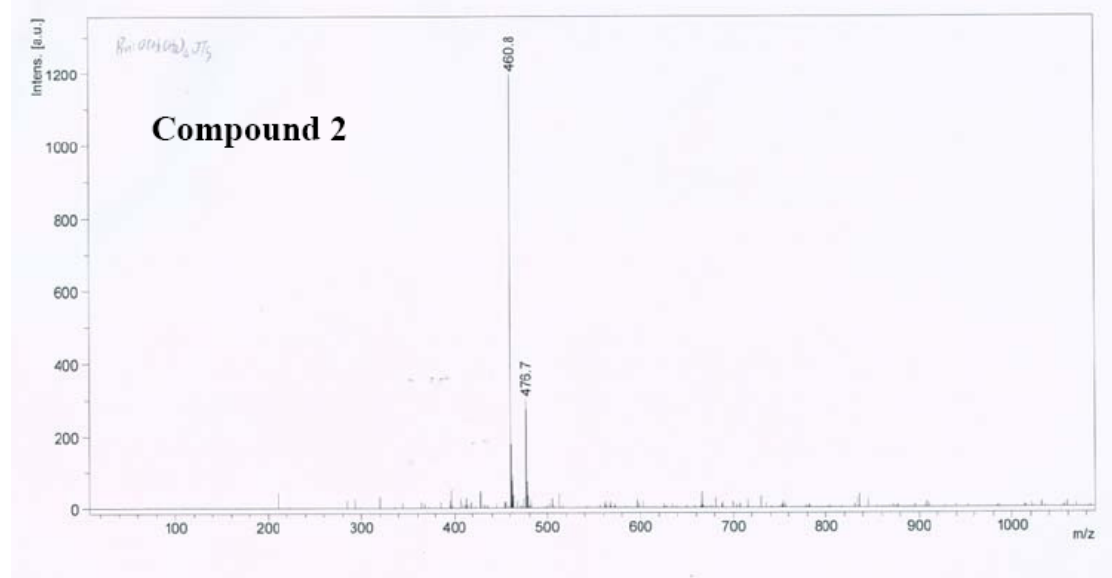

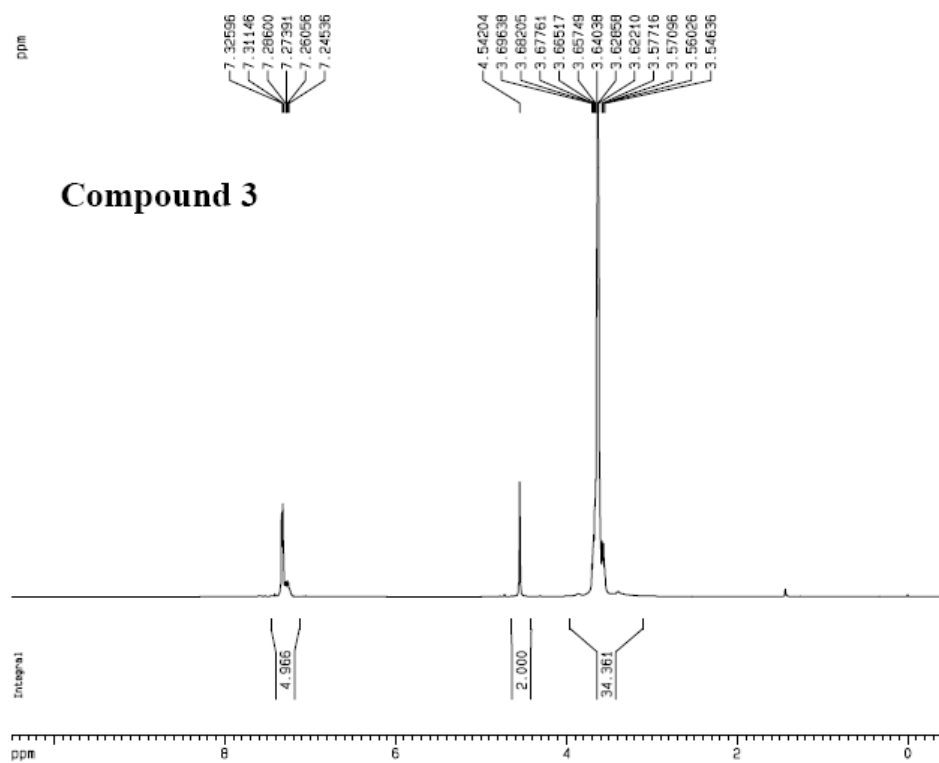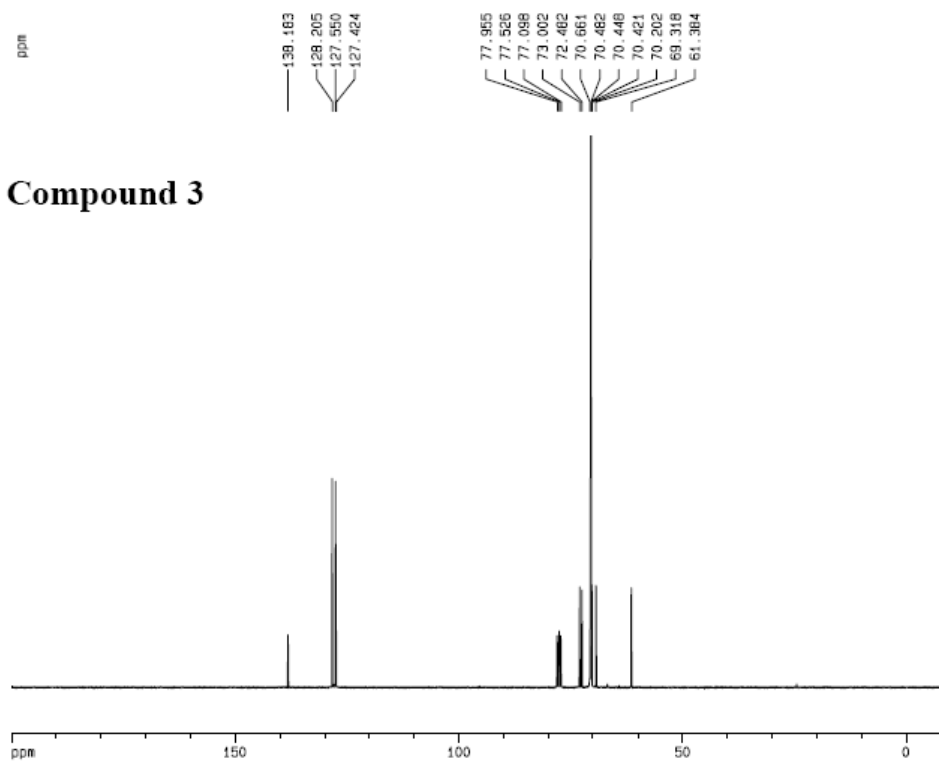

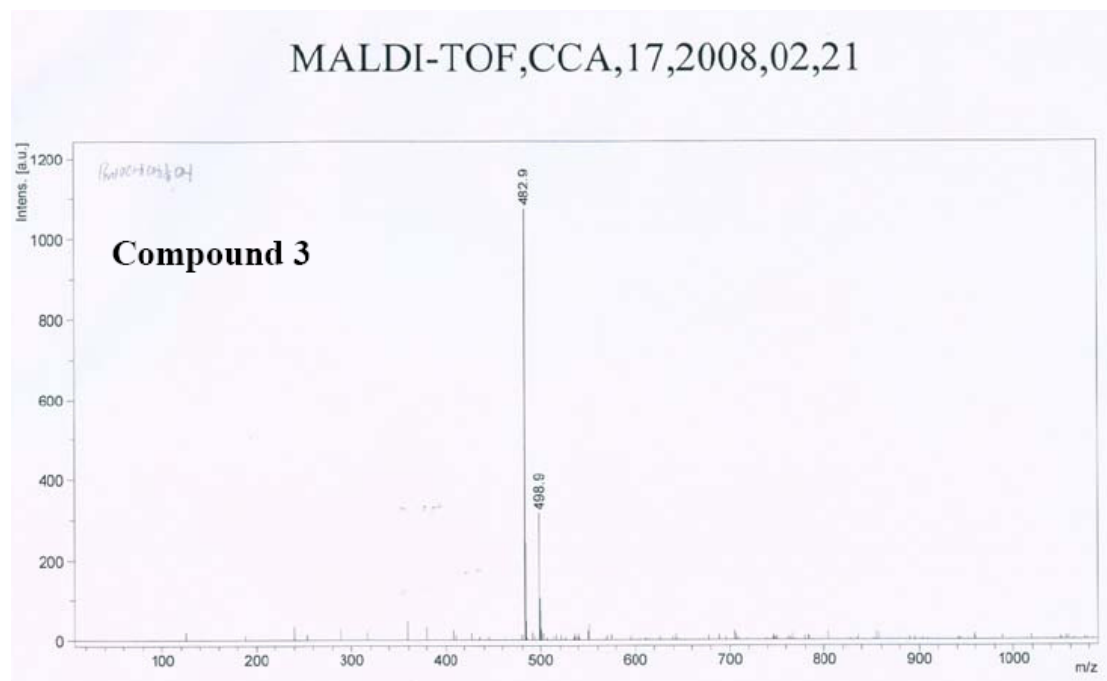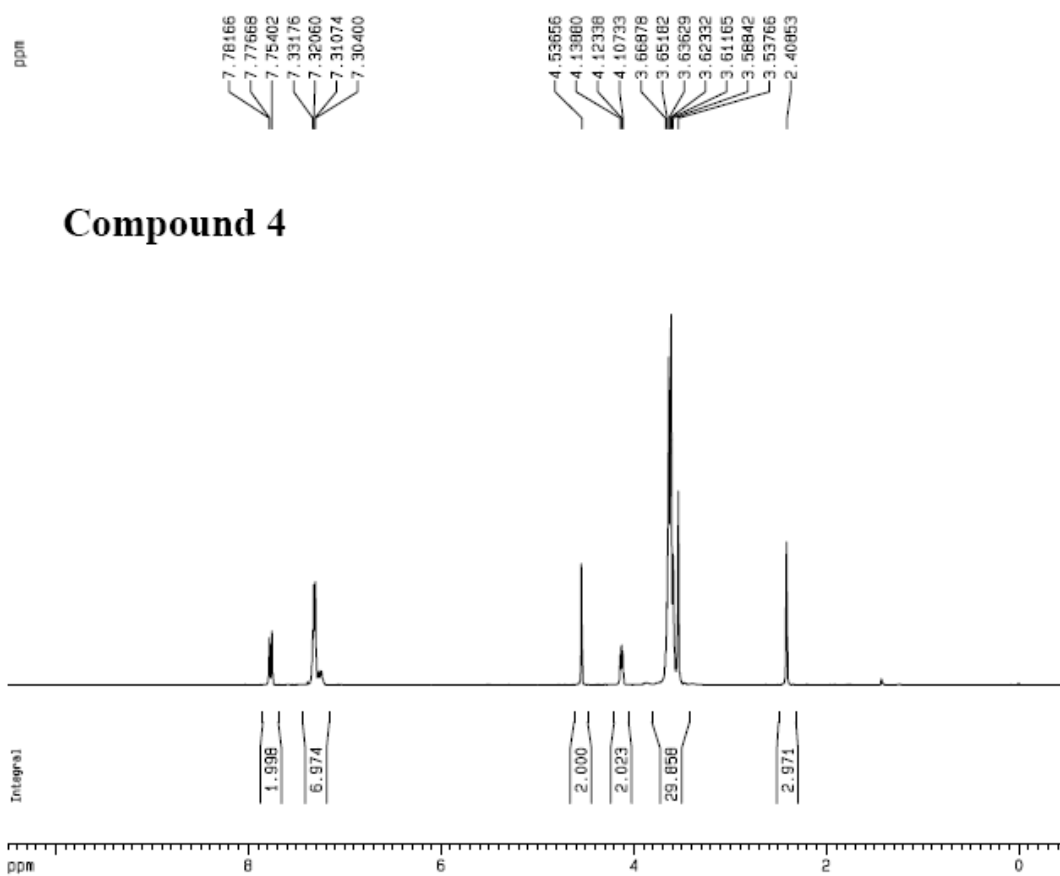

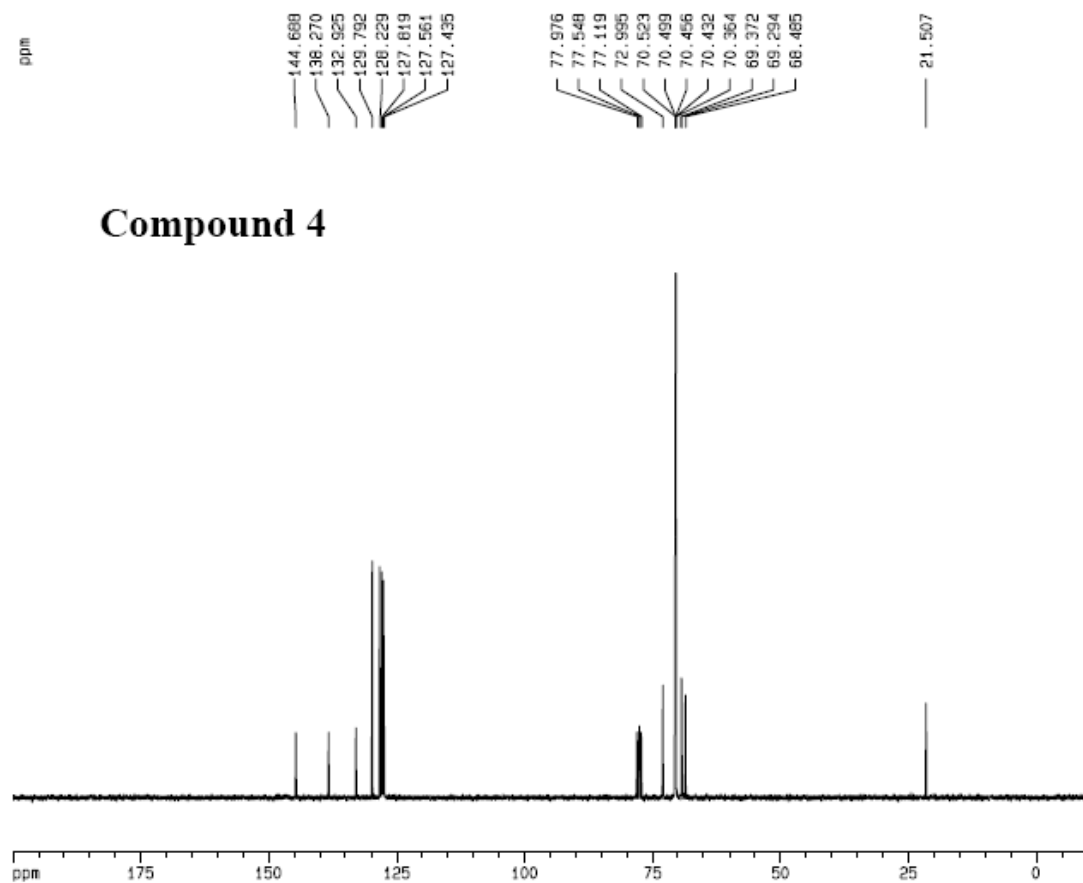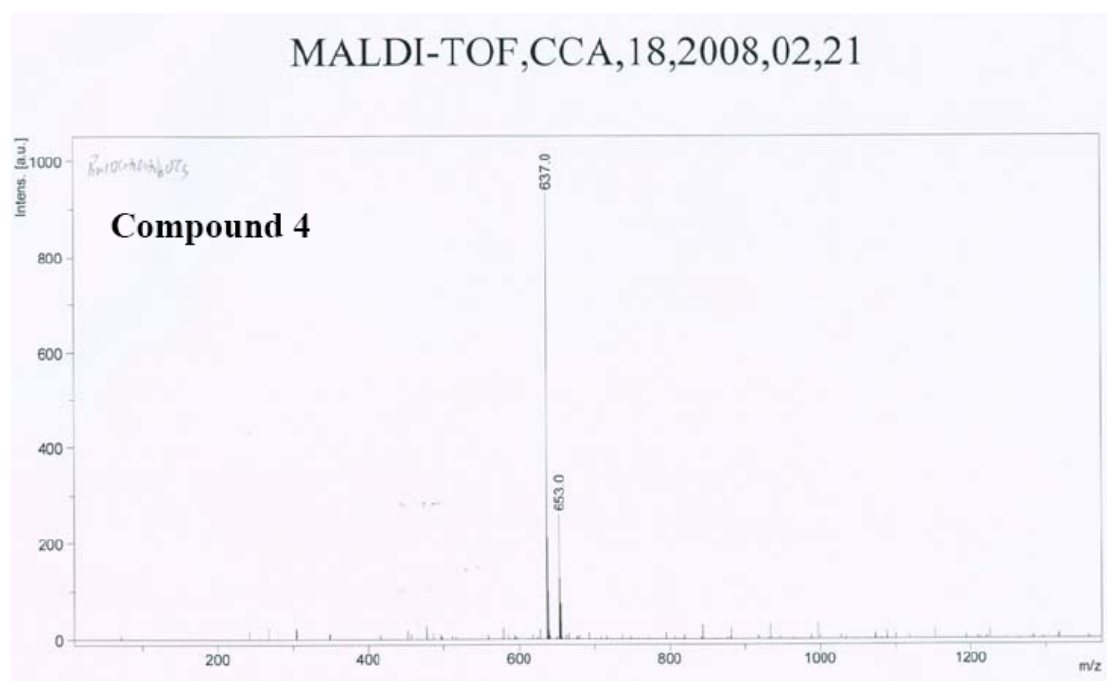

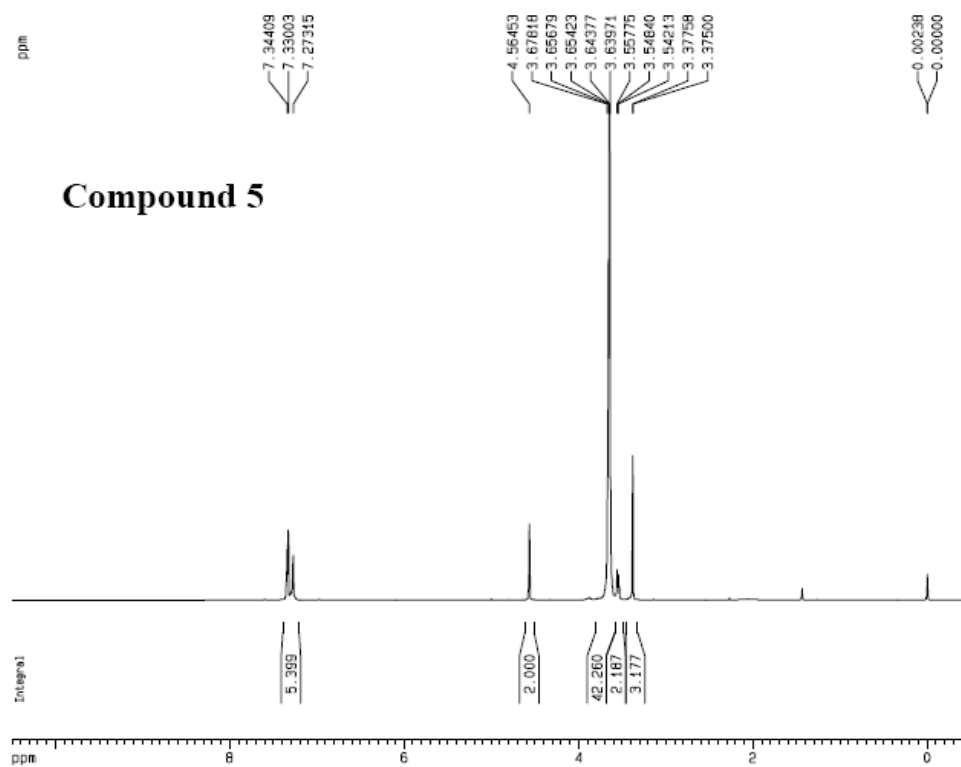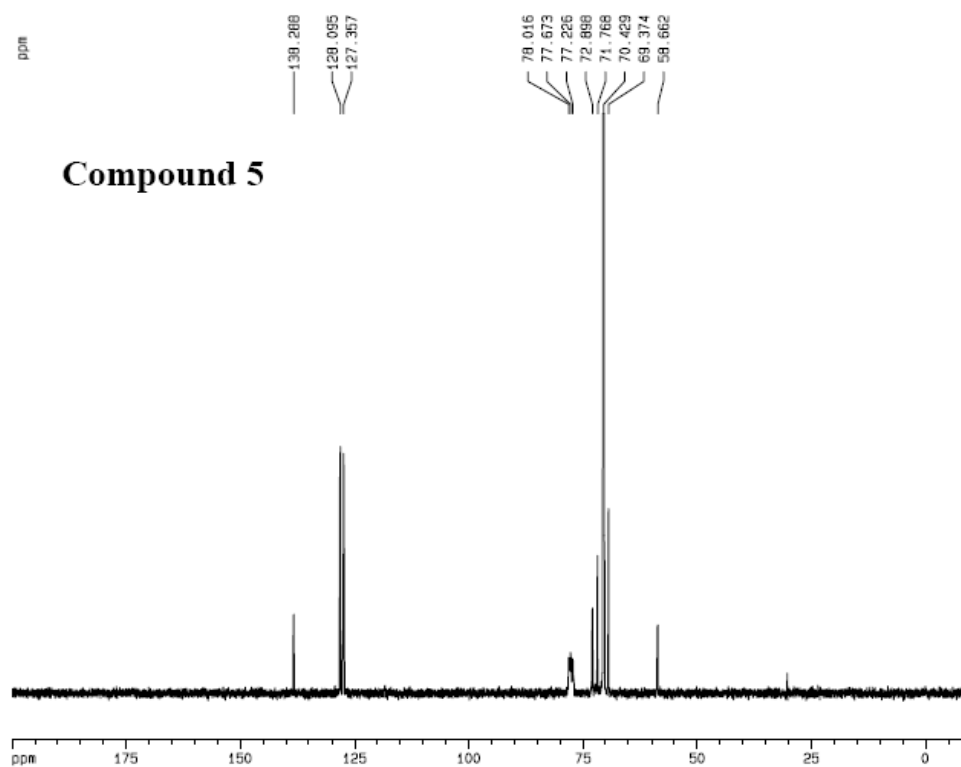

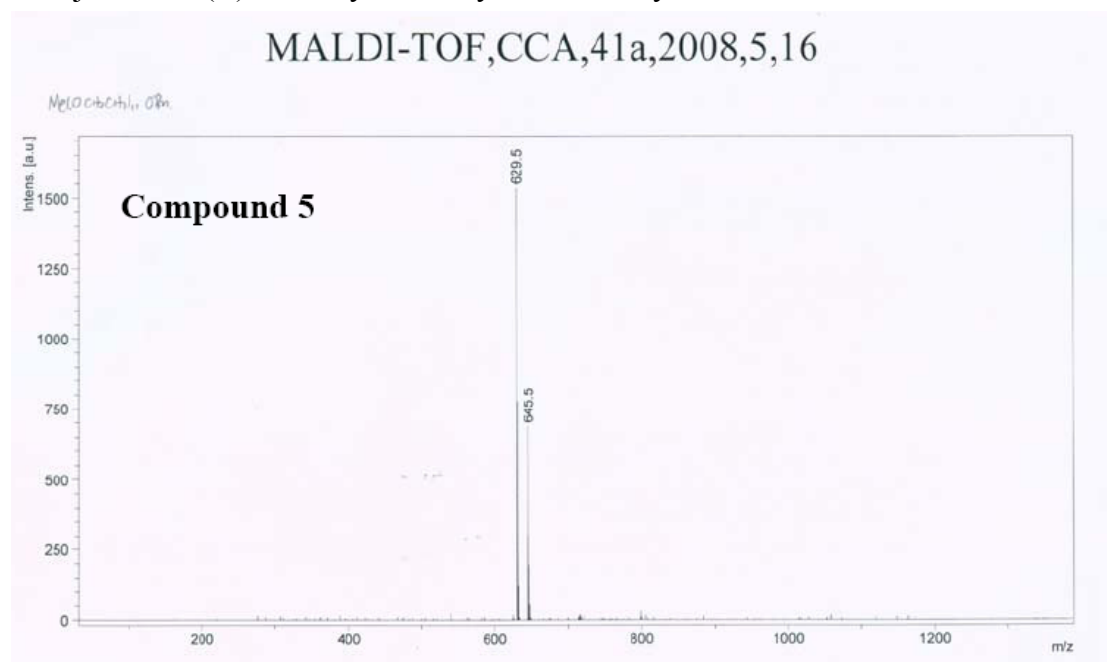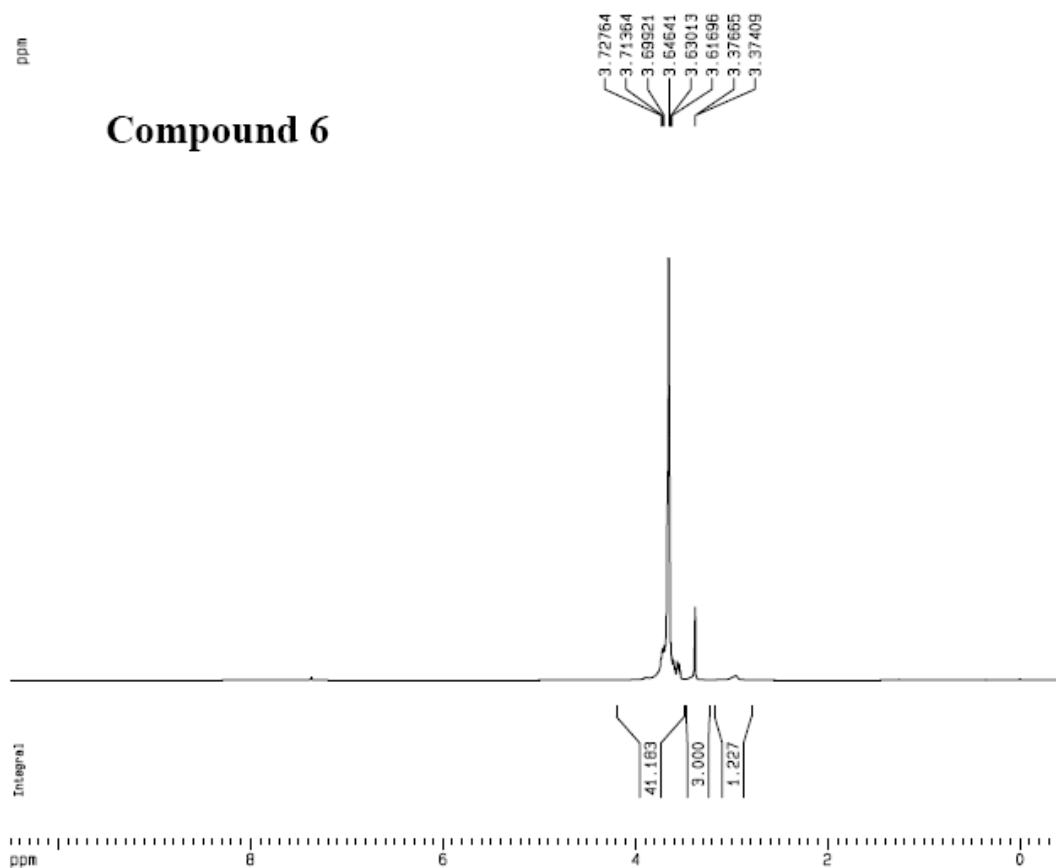



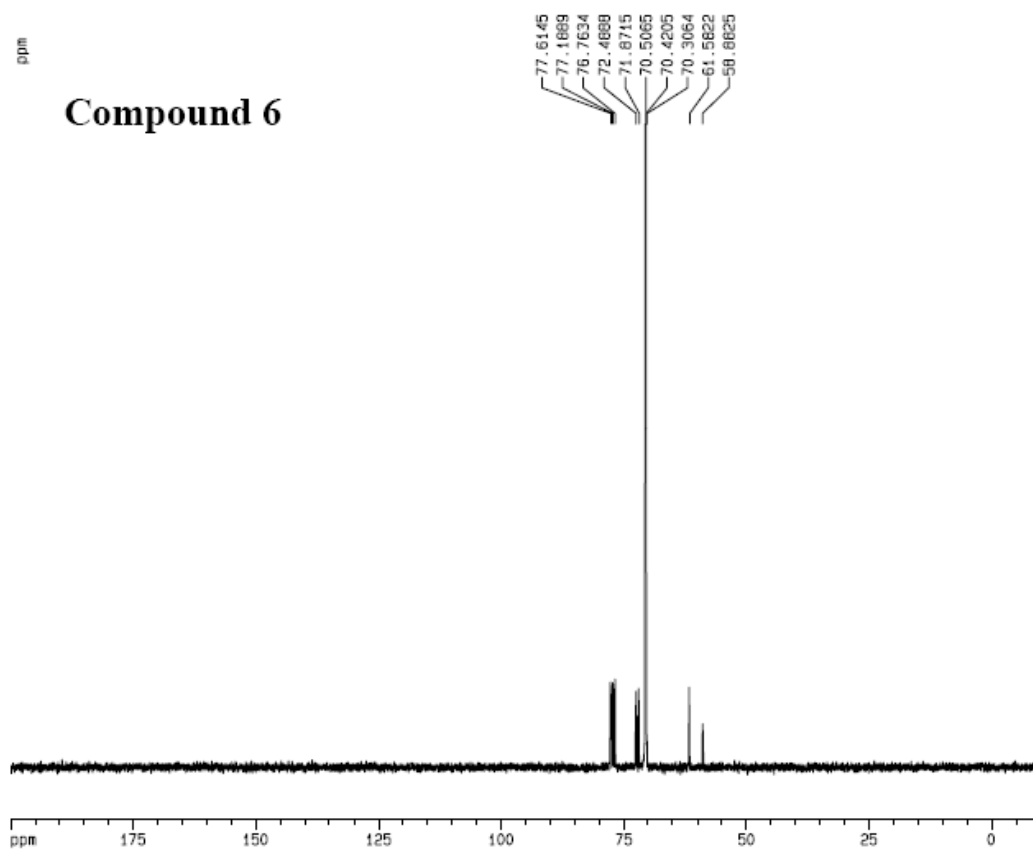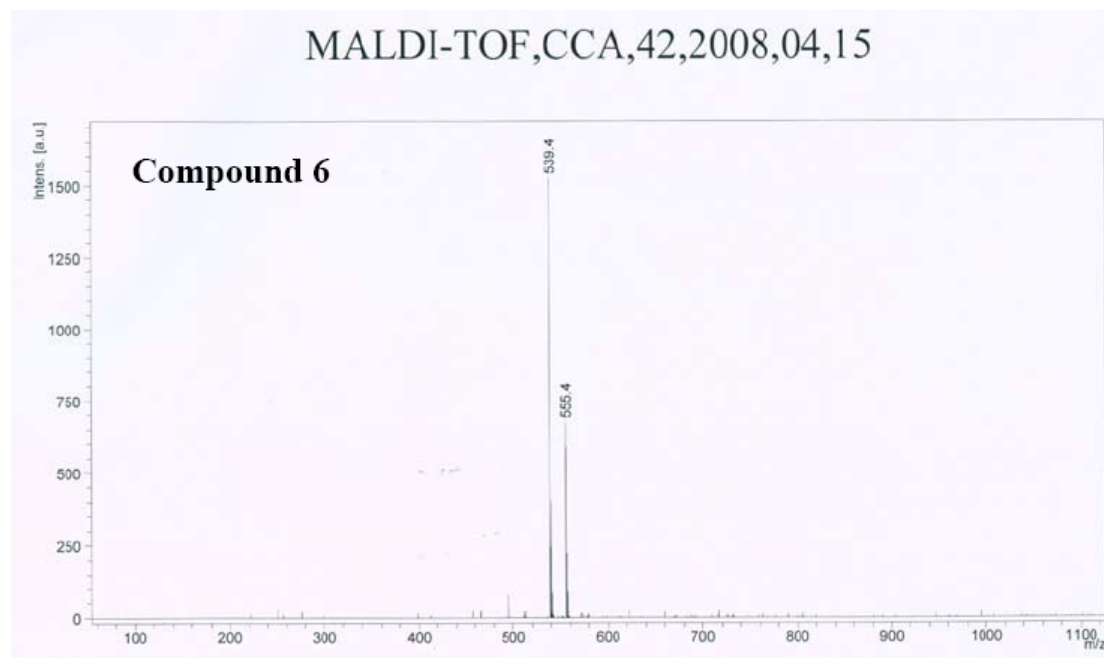

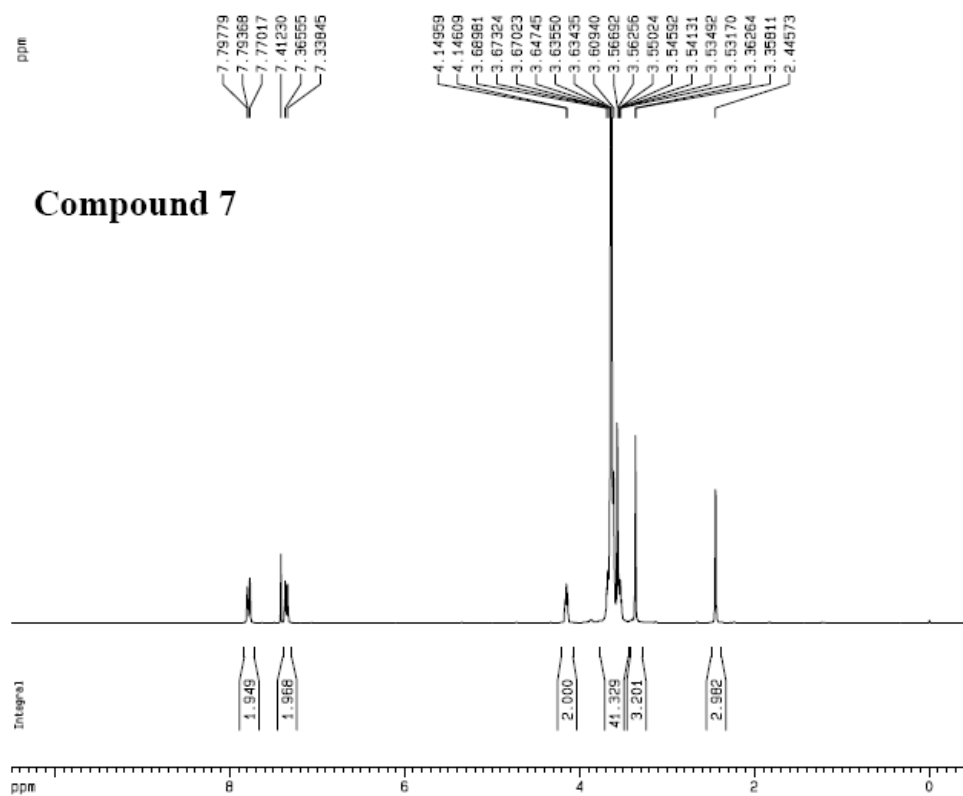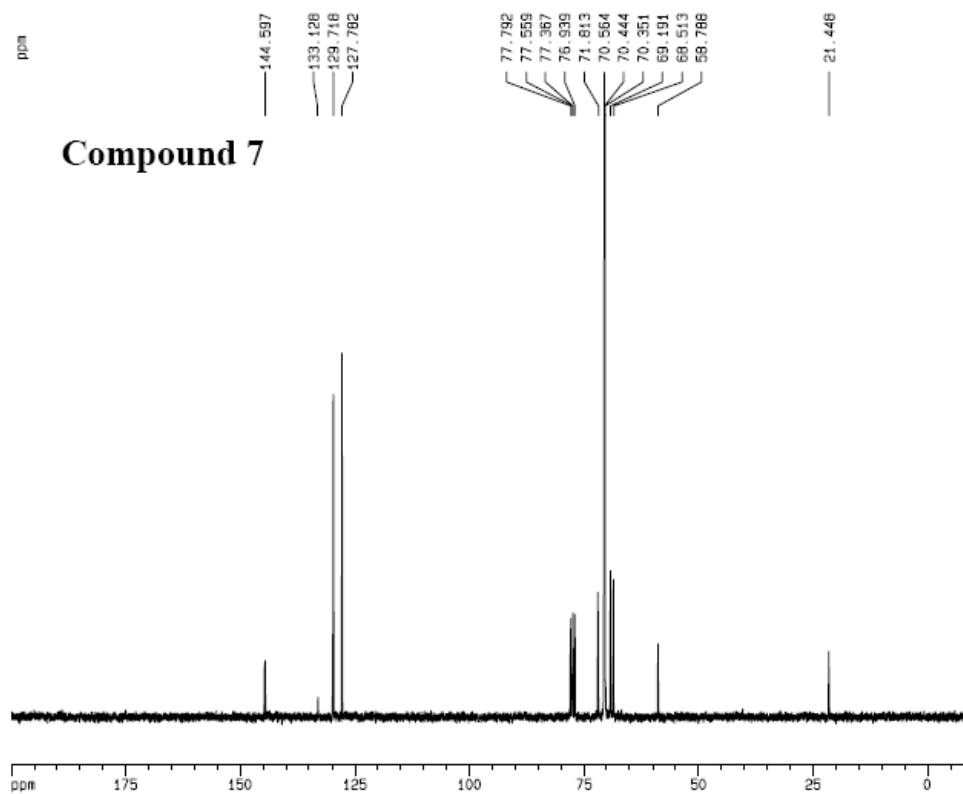

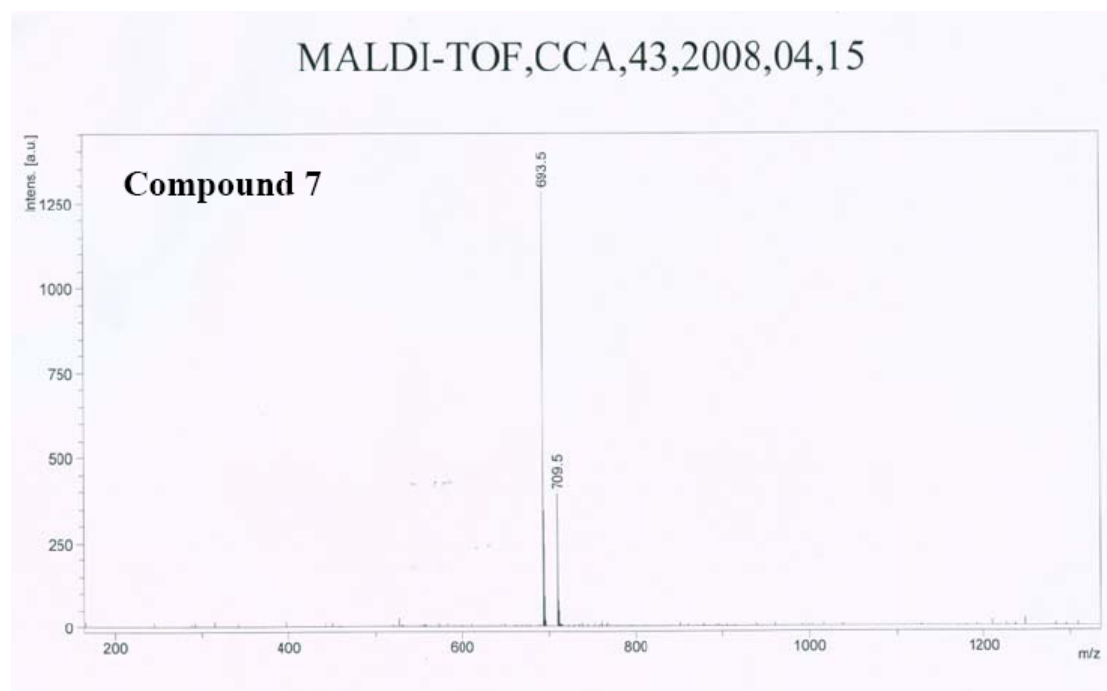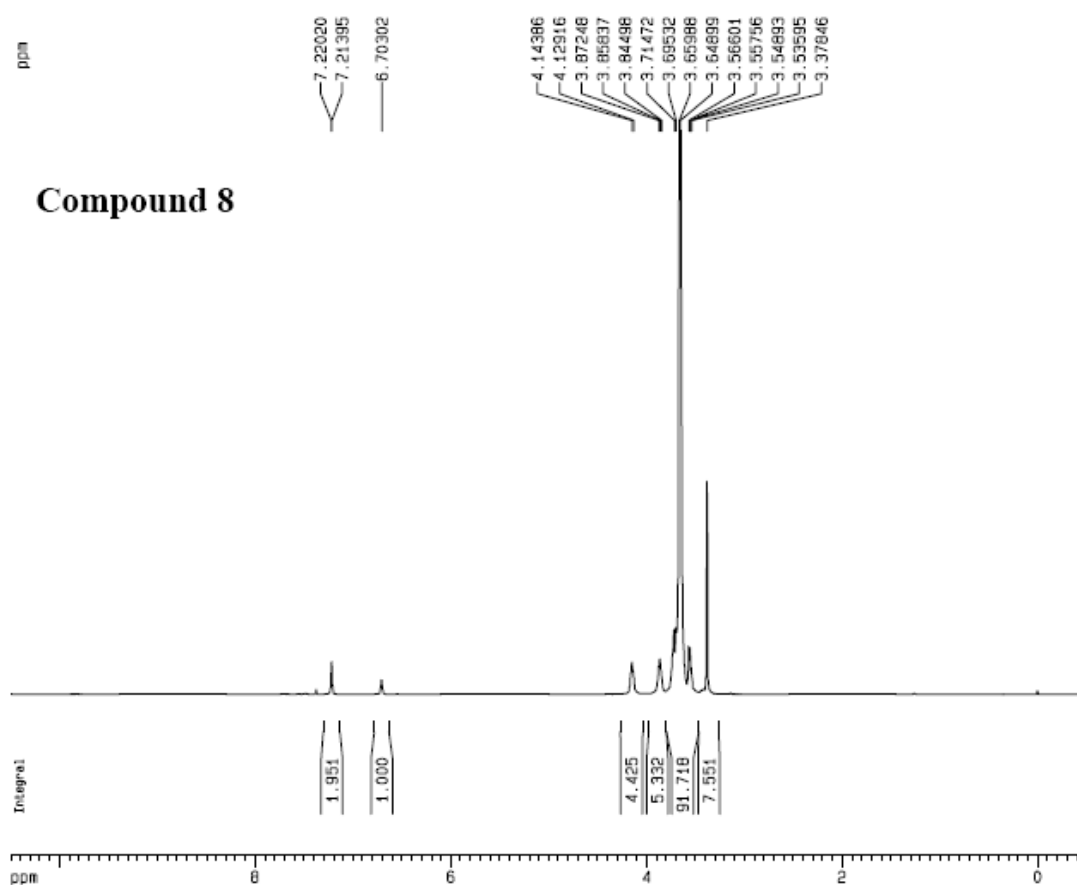

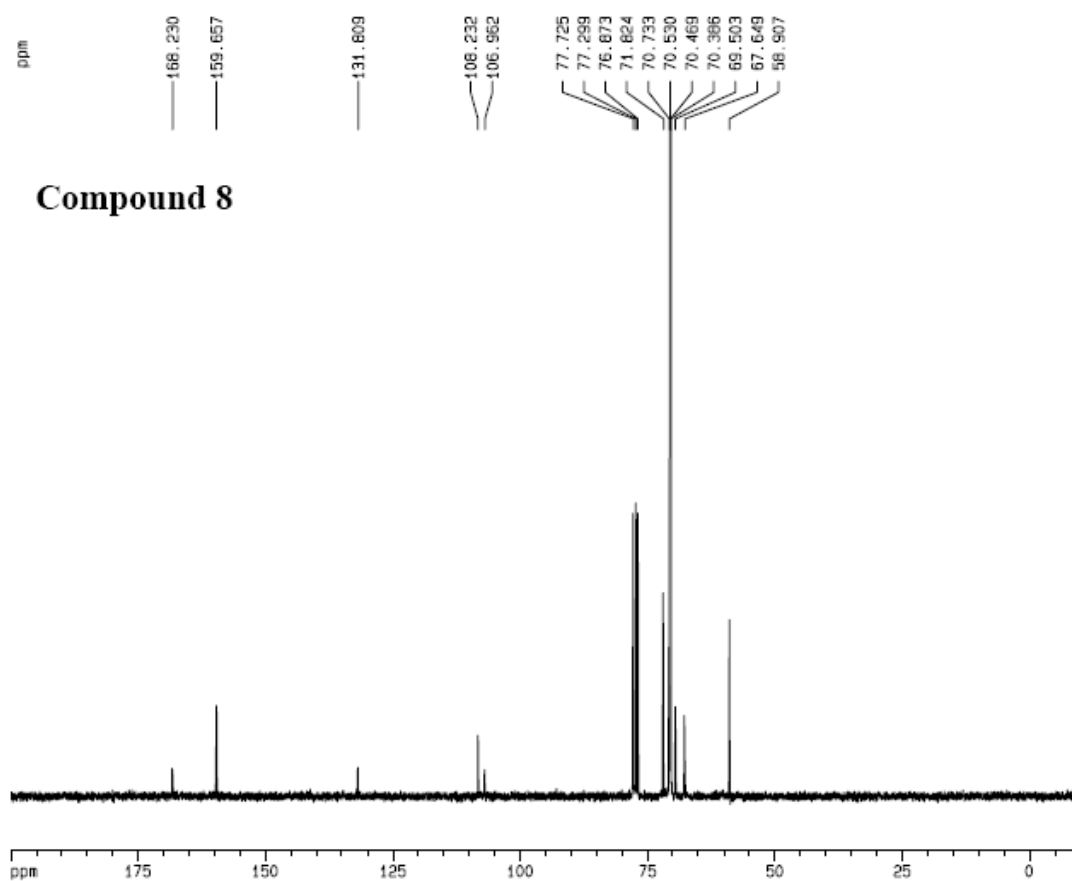

MALDI-TOF, CCA, 44, 2008, 04, 15

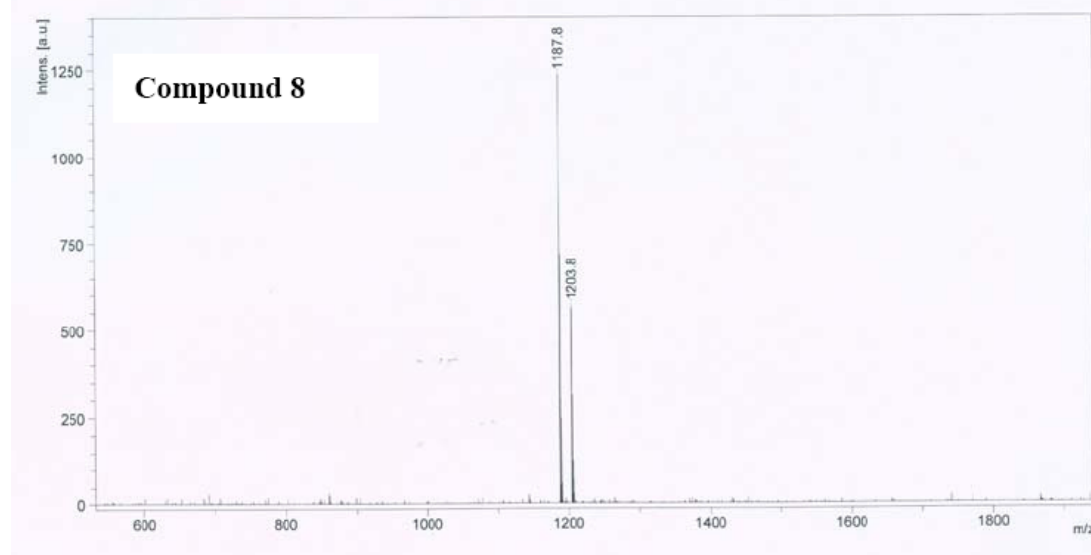

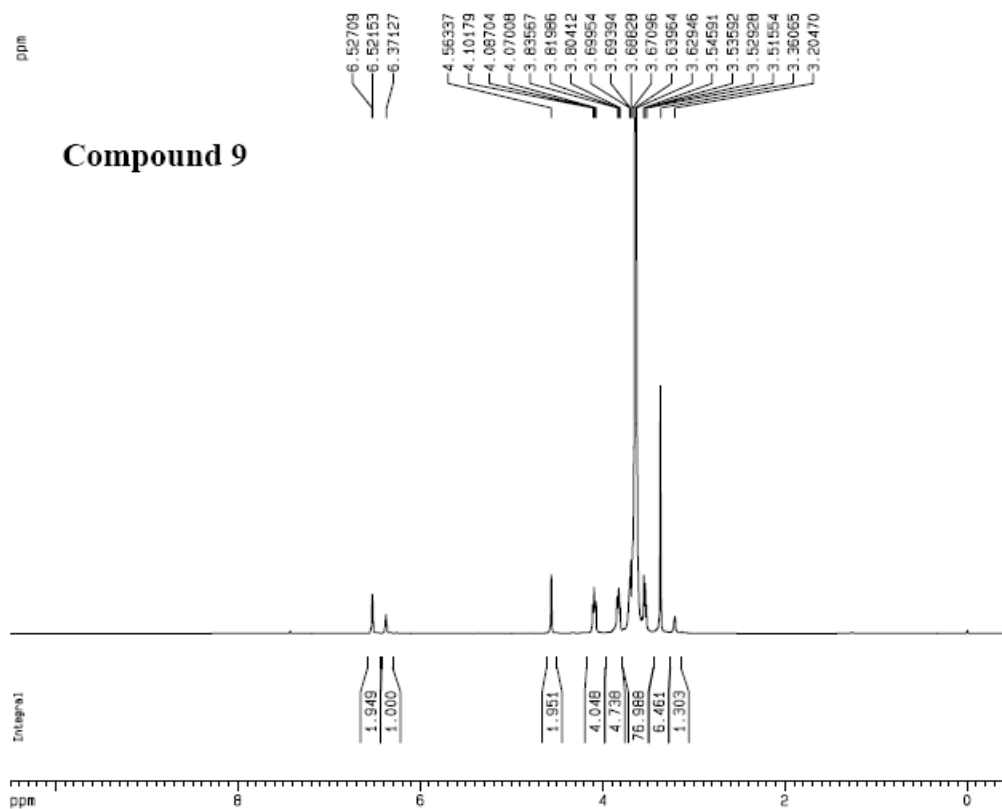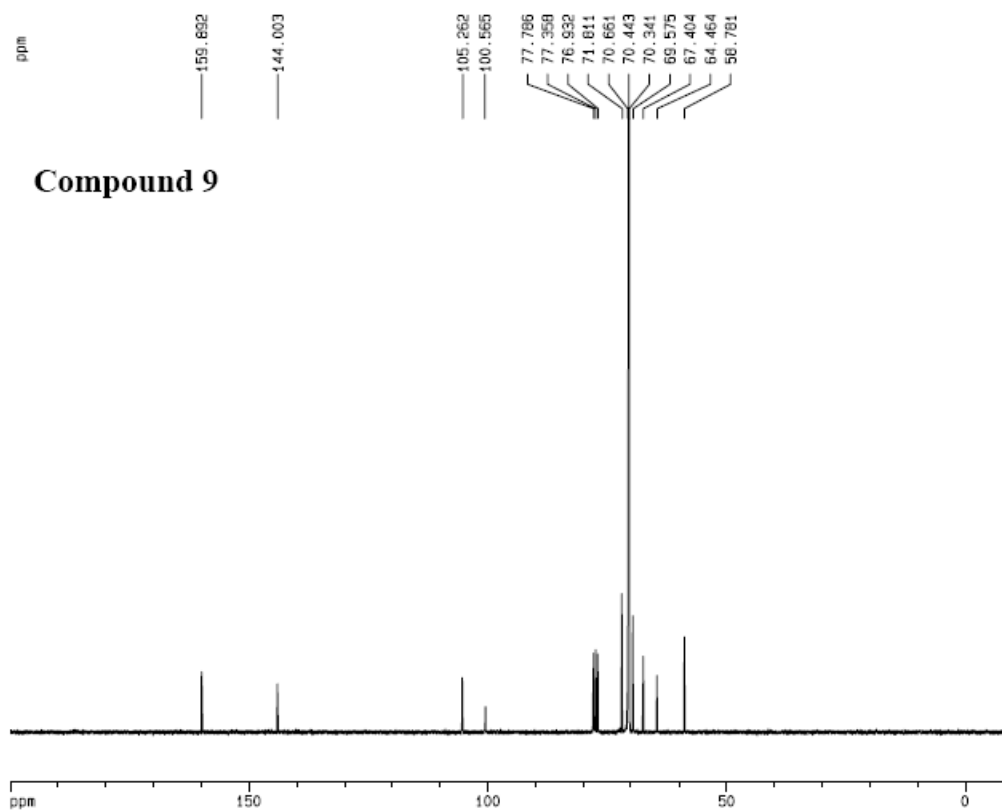

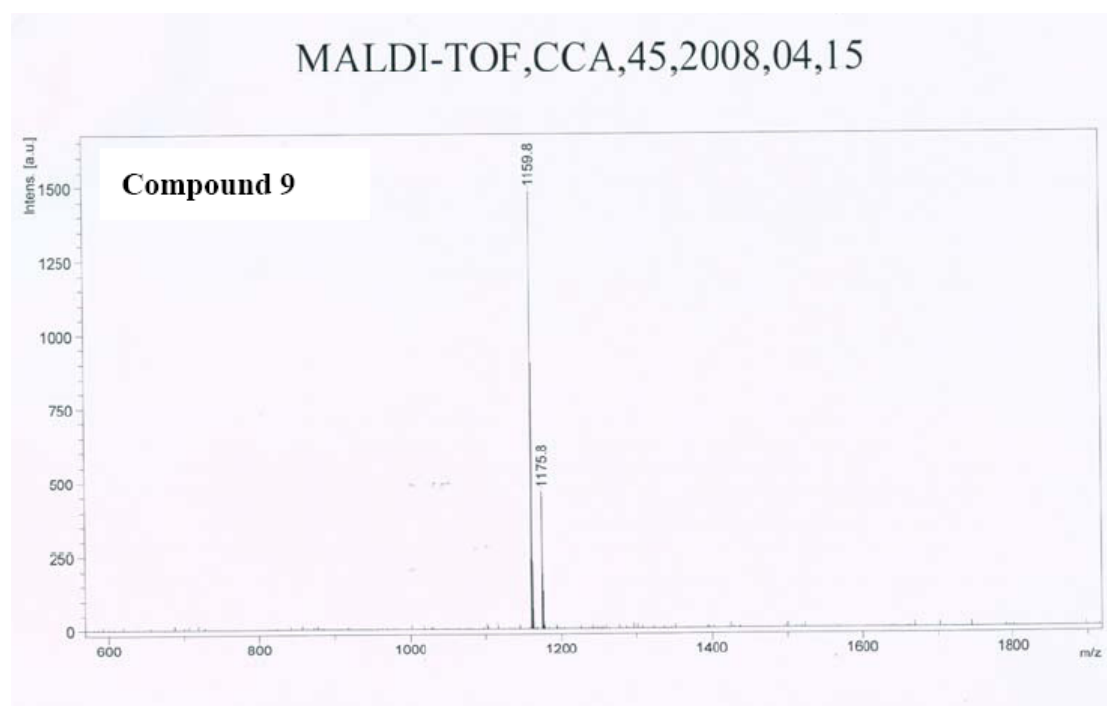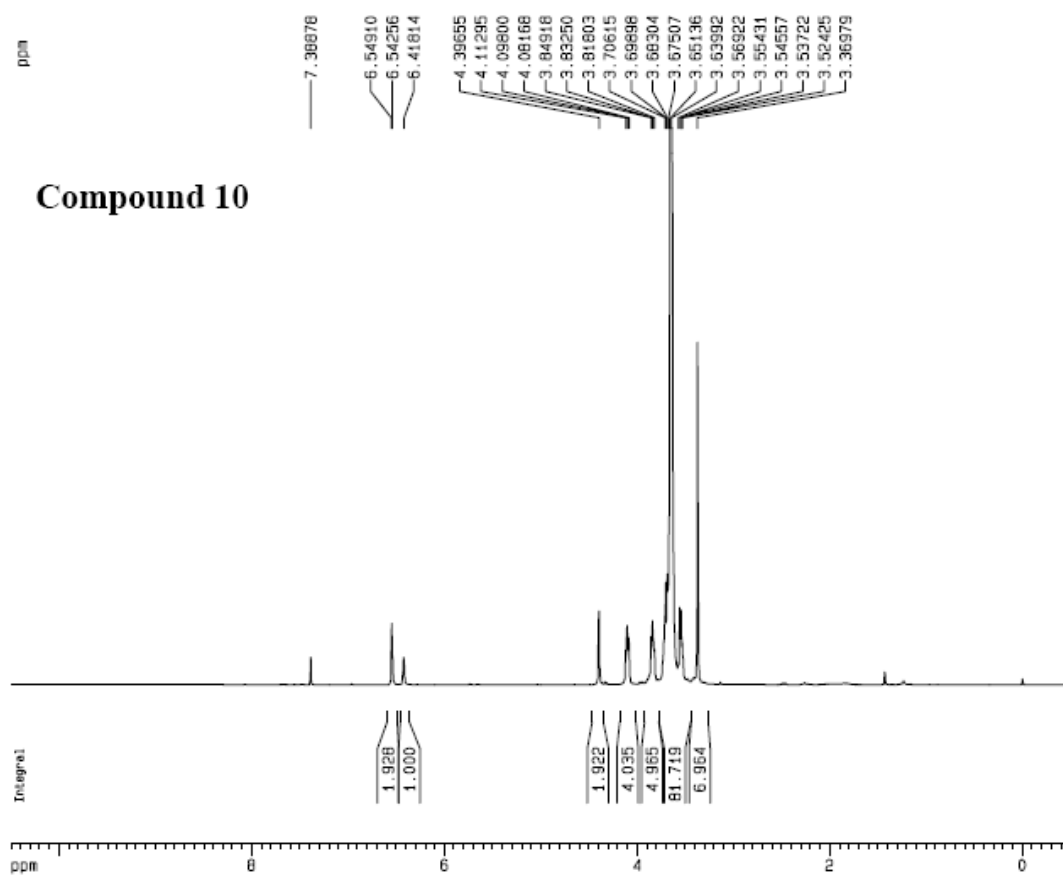

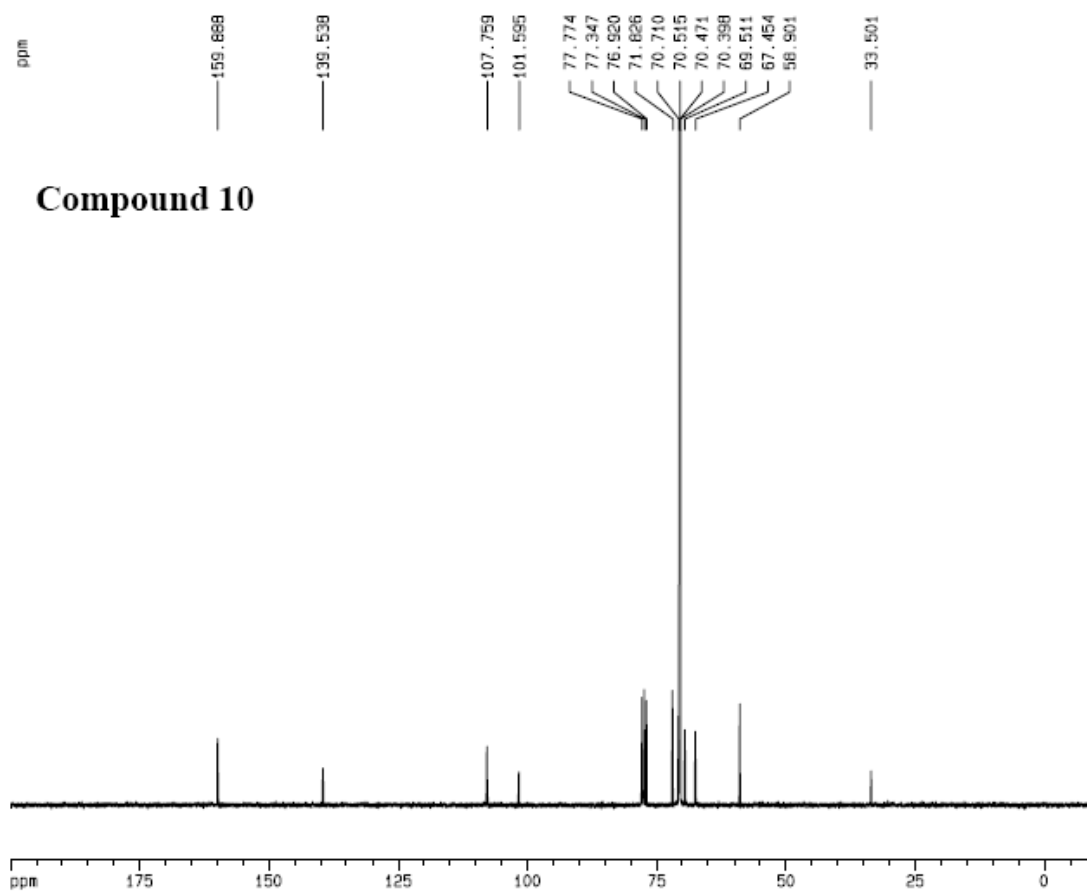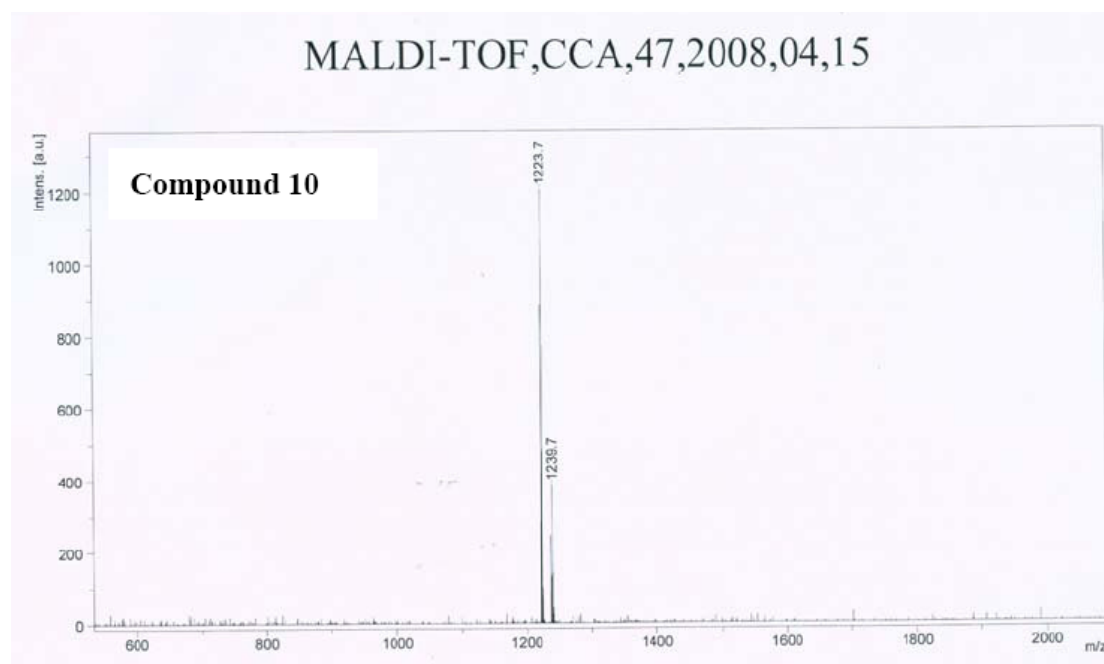

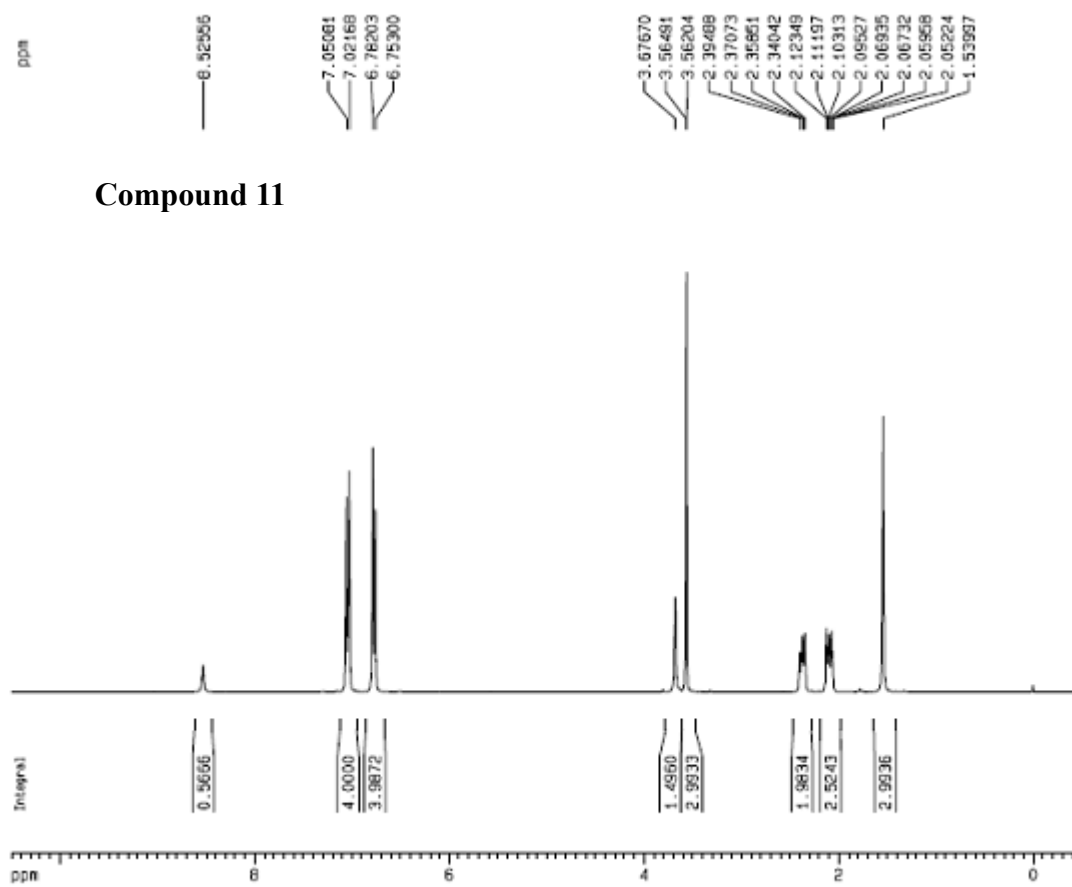



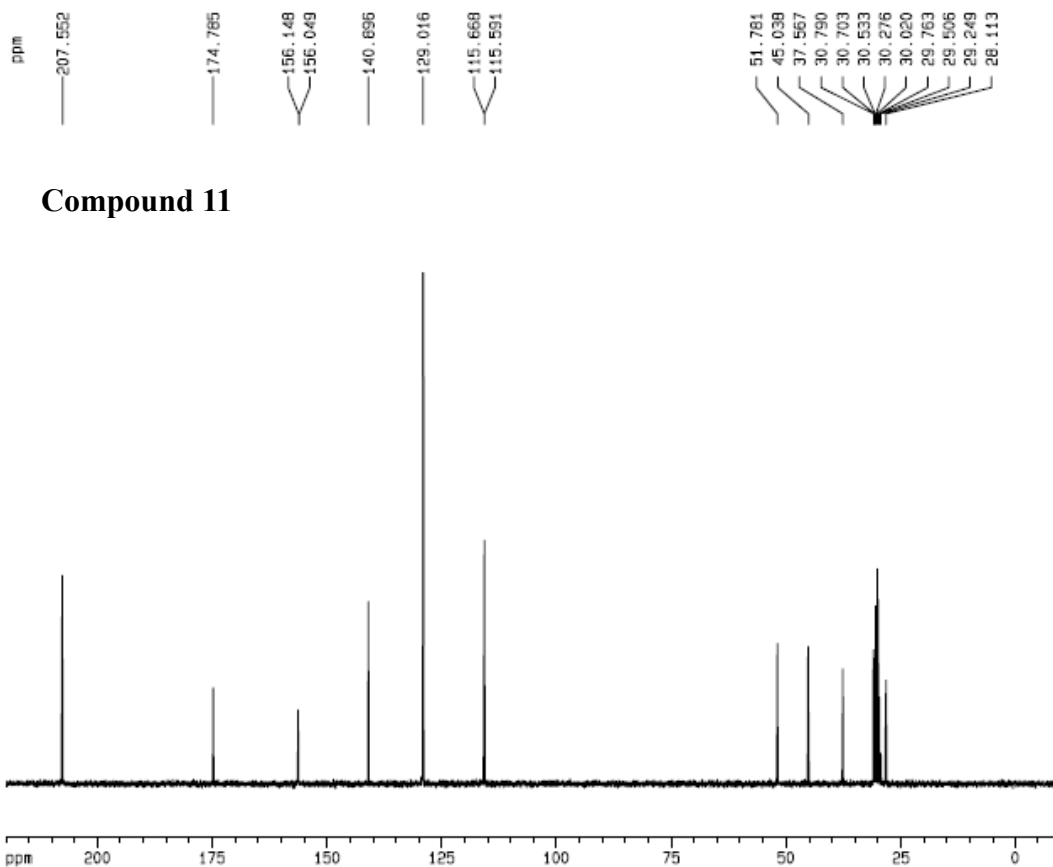

**Compound 11**

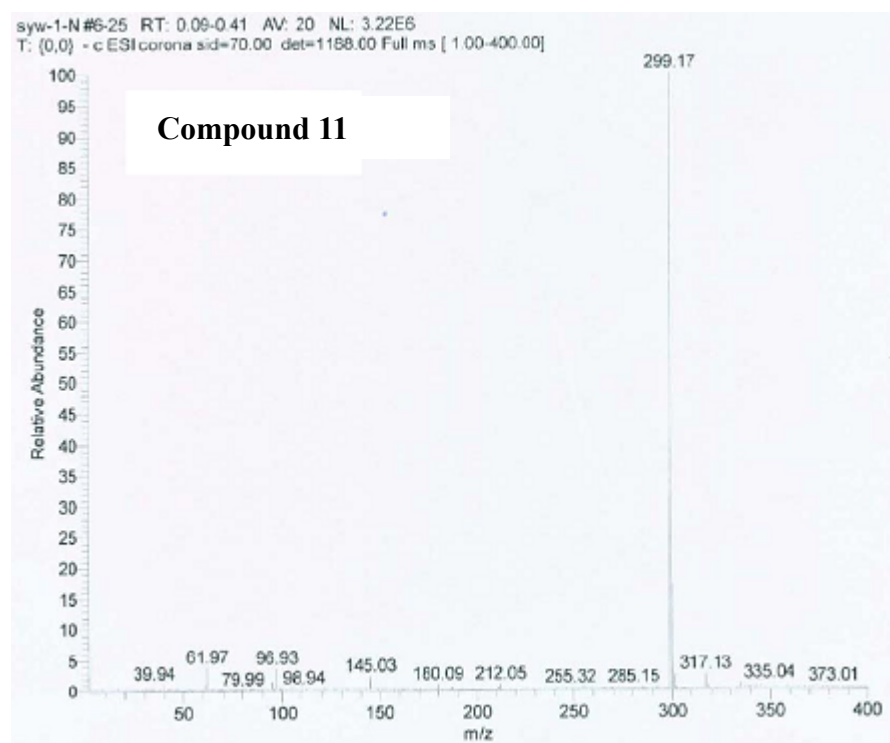

**Compound 11**

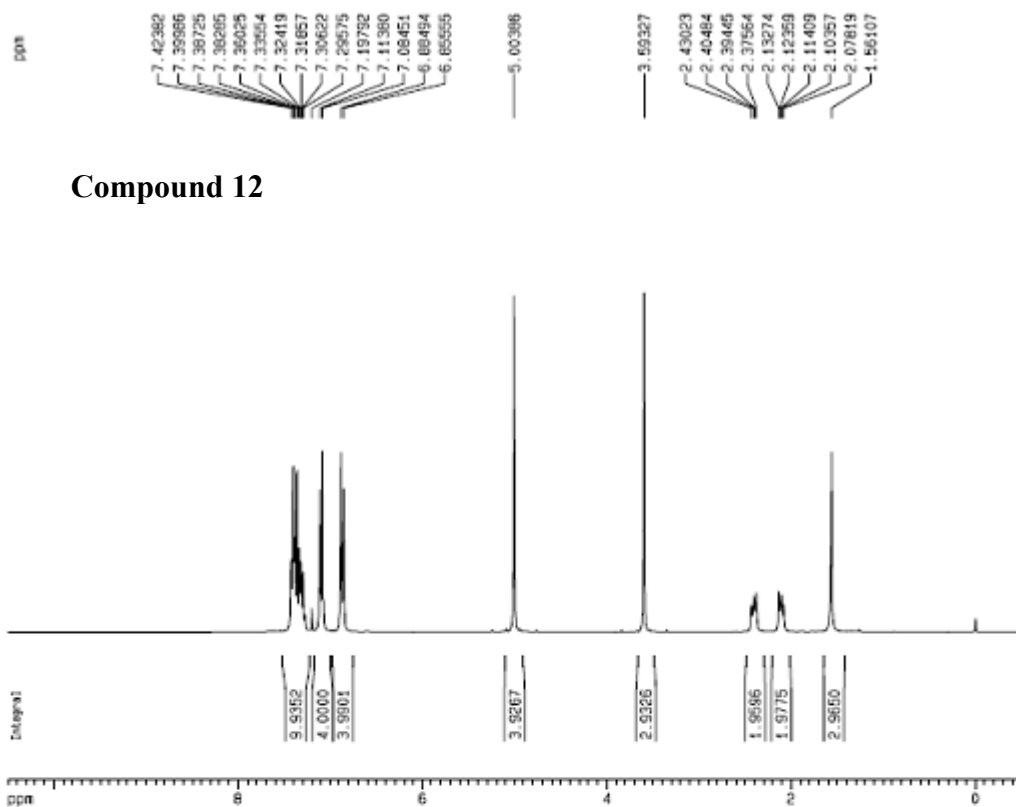

Compound 12

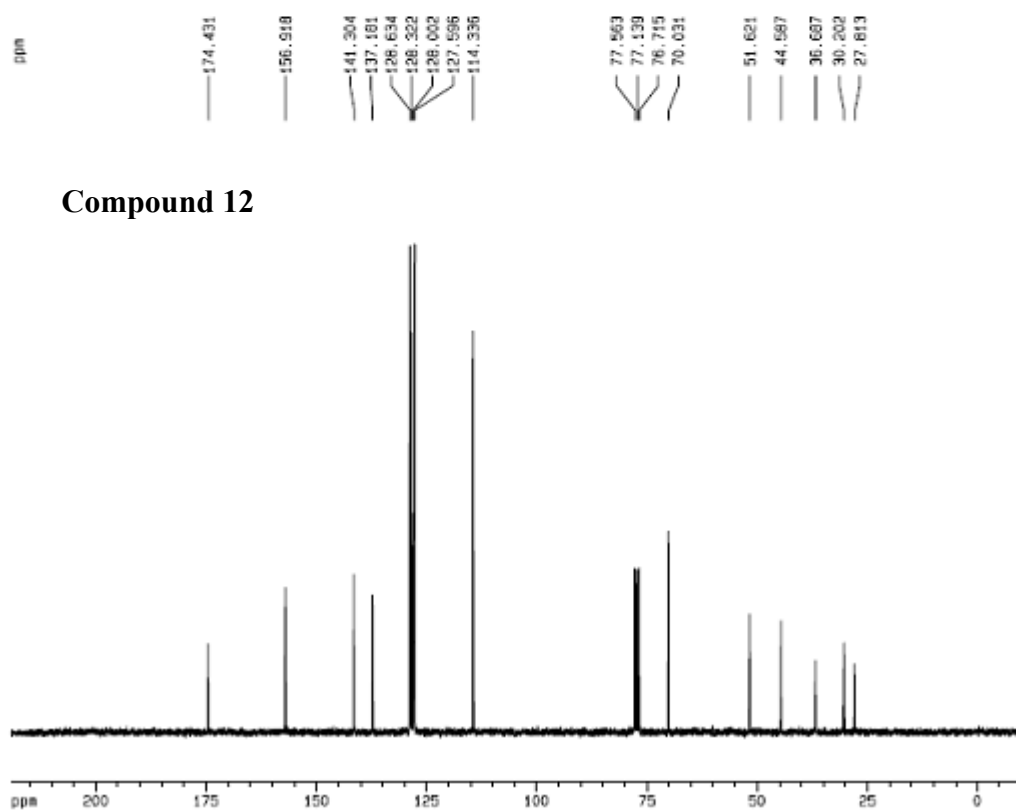

Compound 12

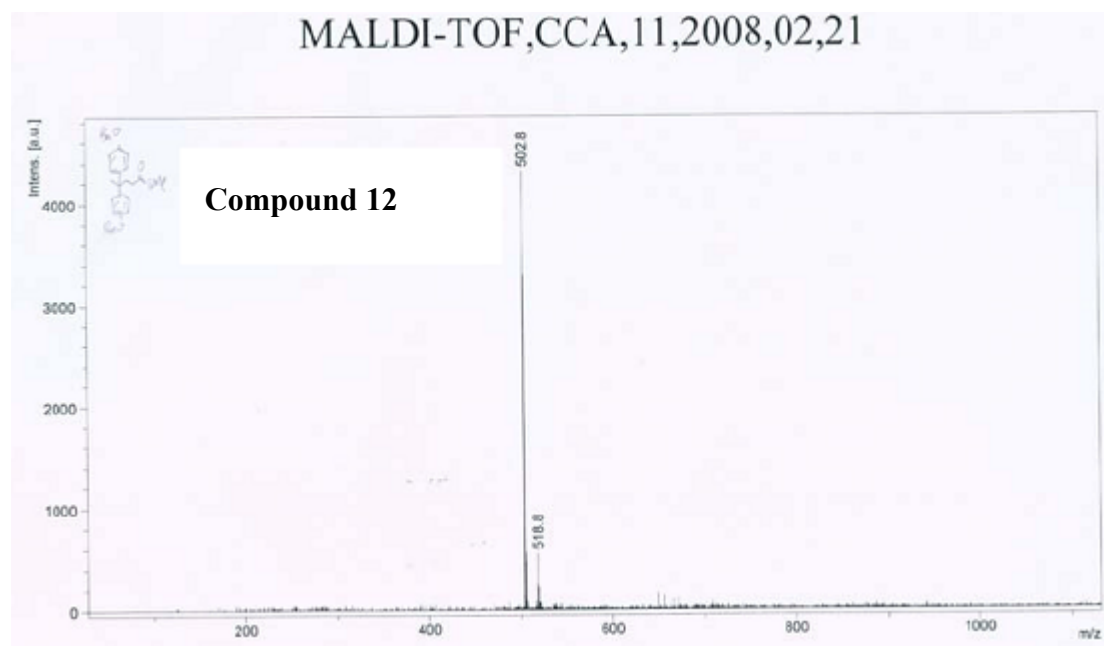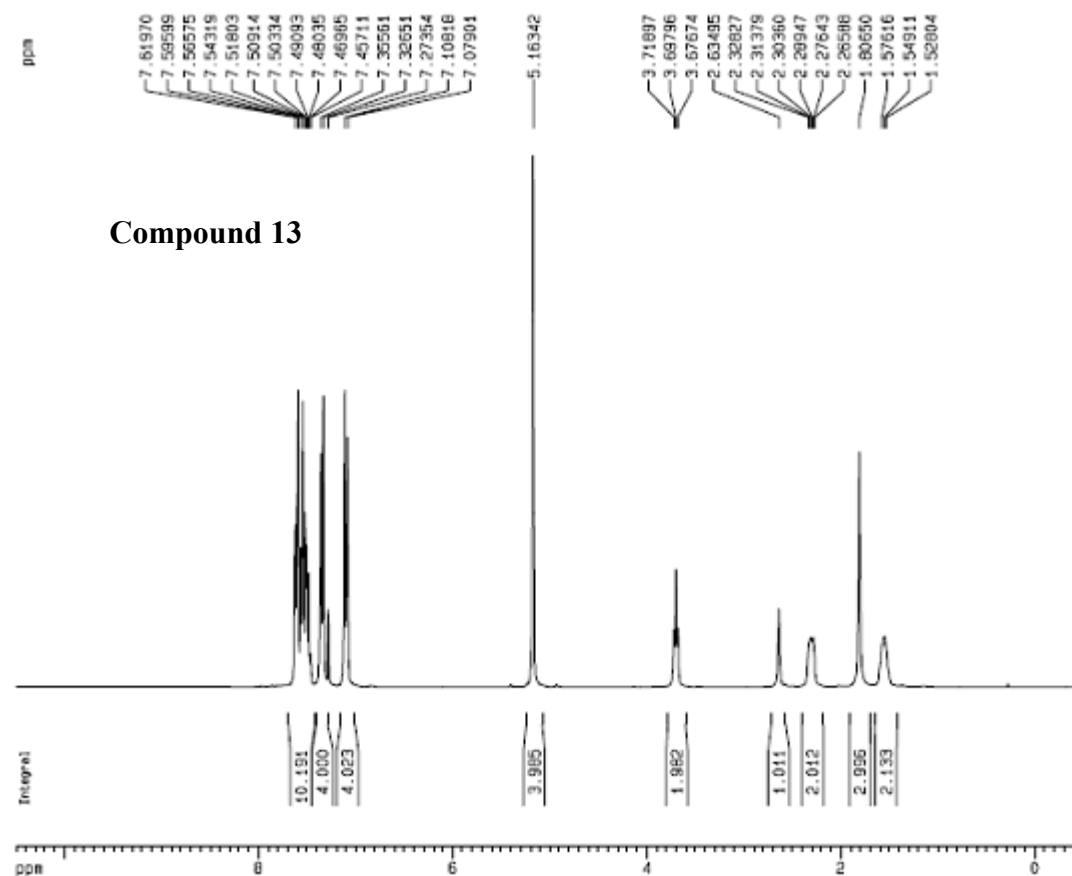

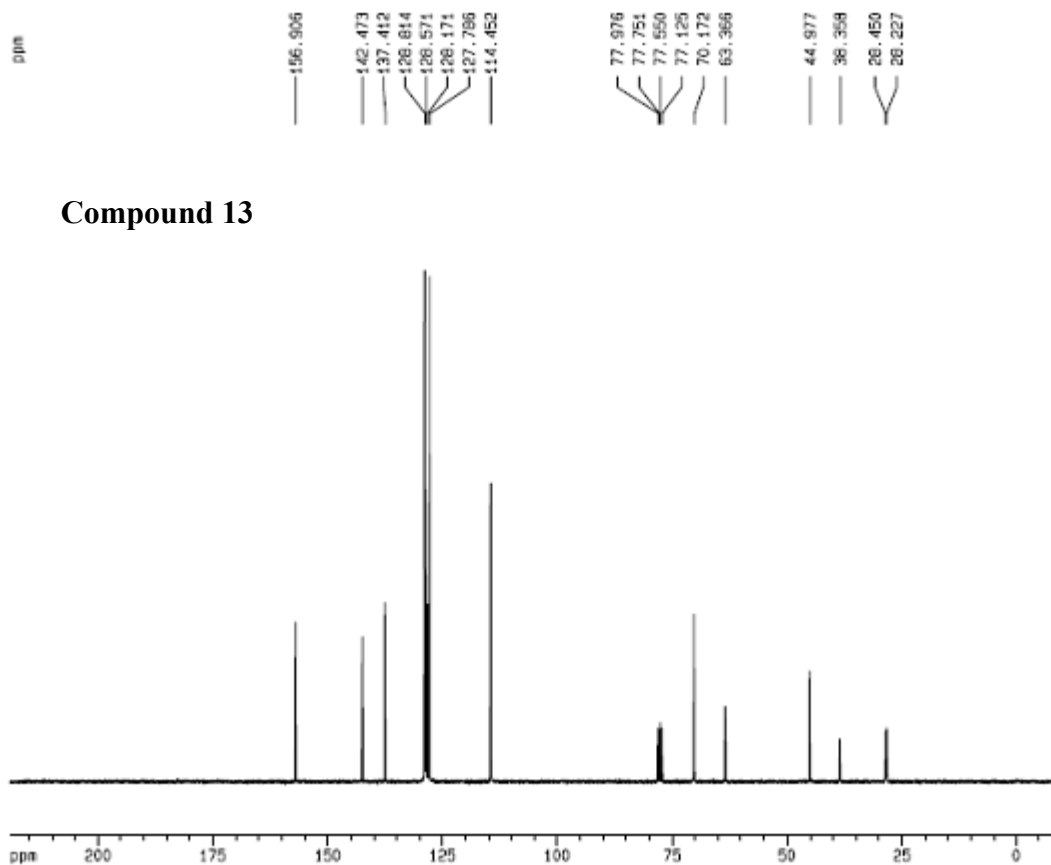

**Compound 13**

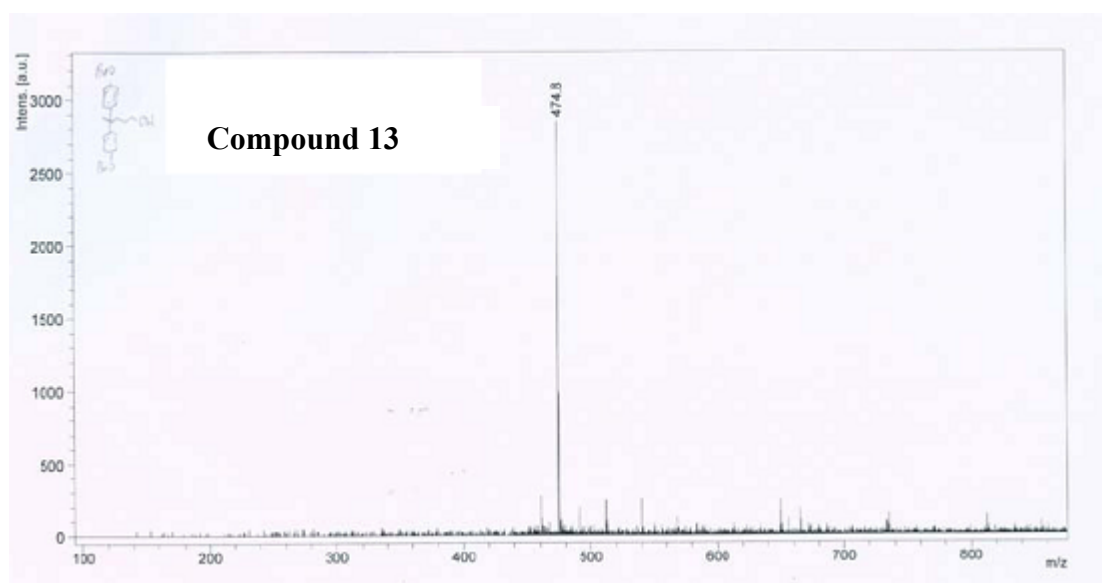

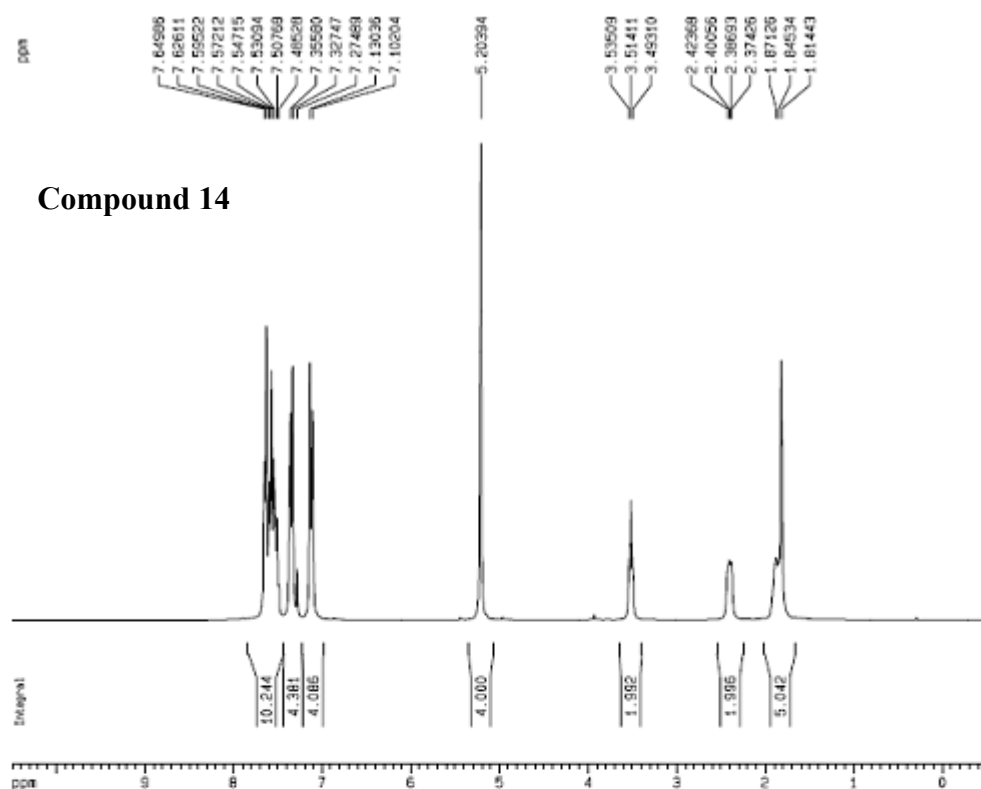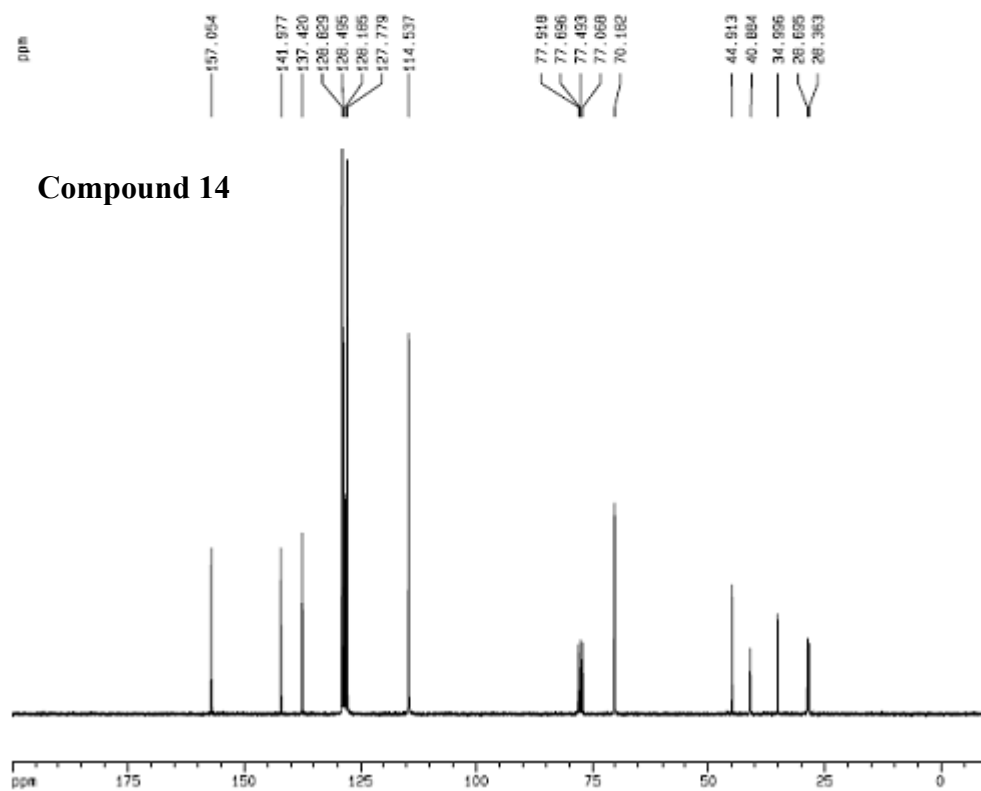

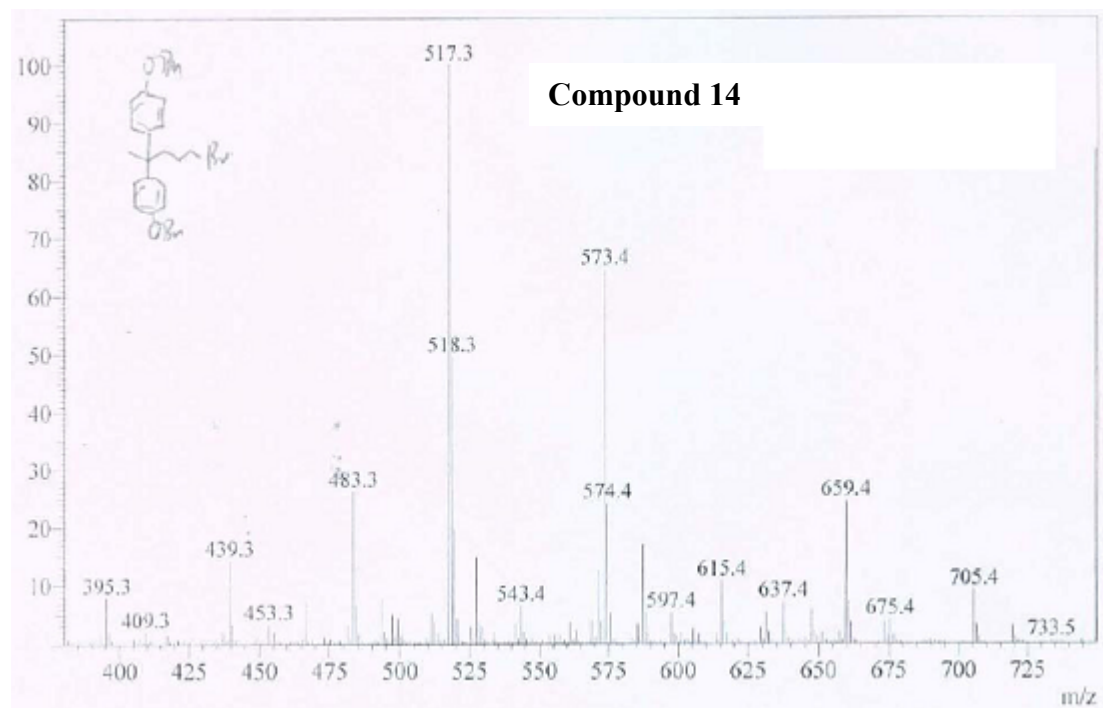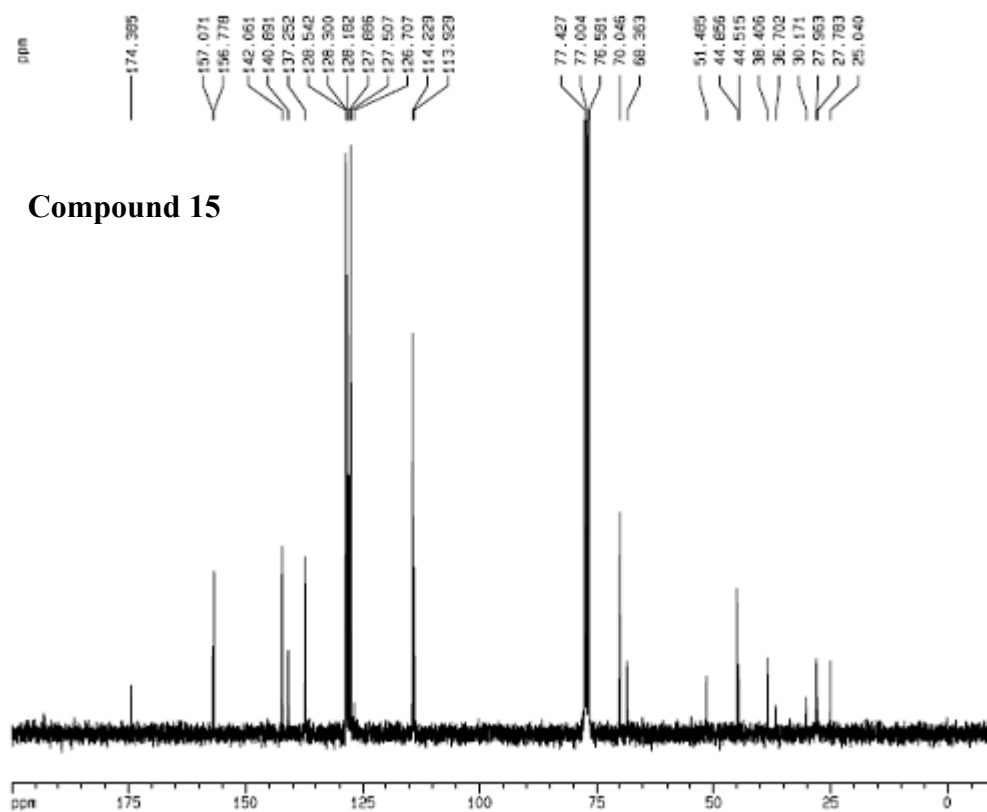



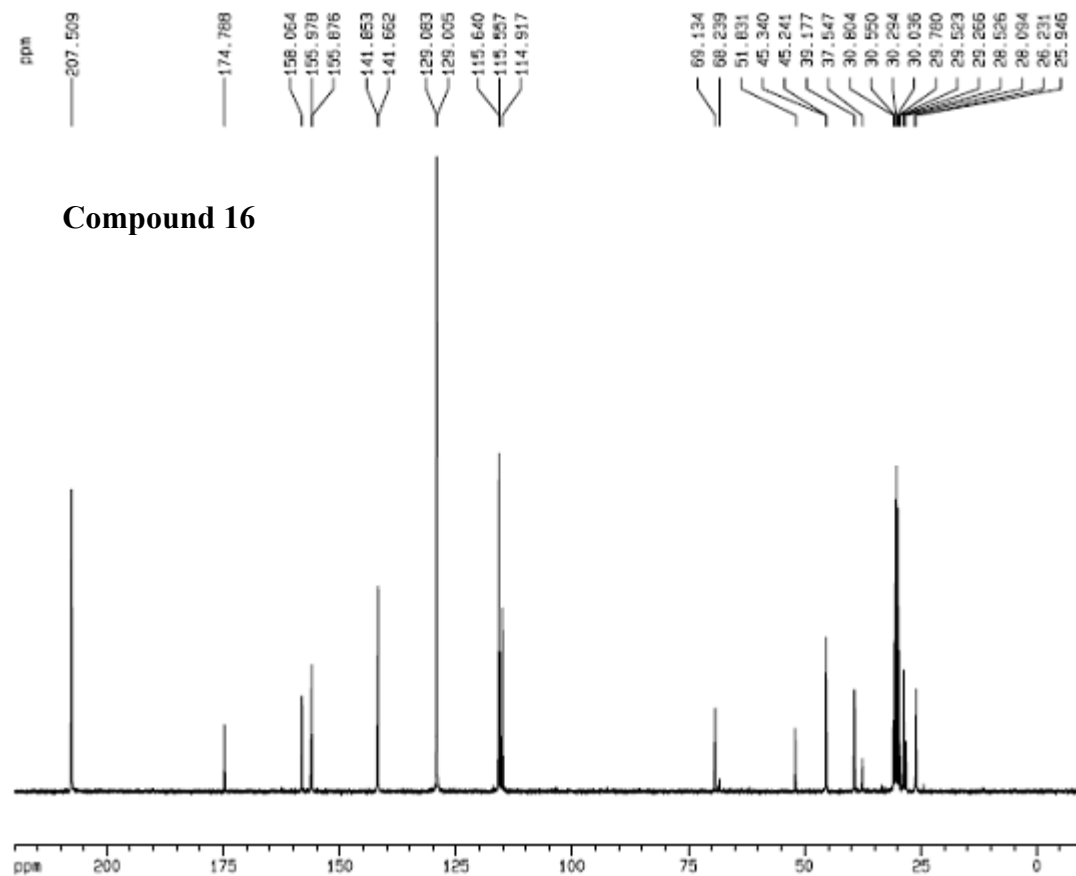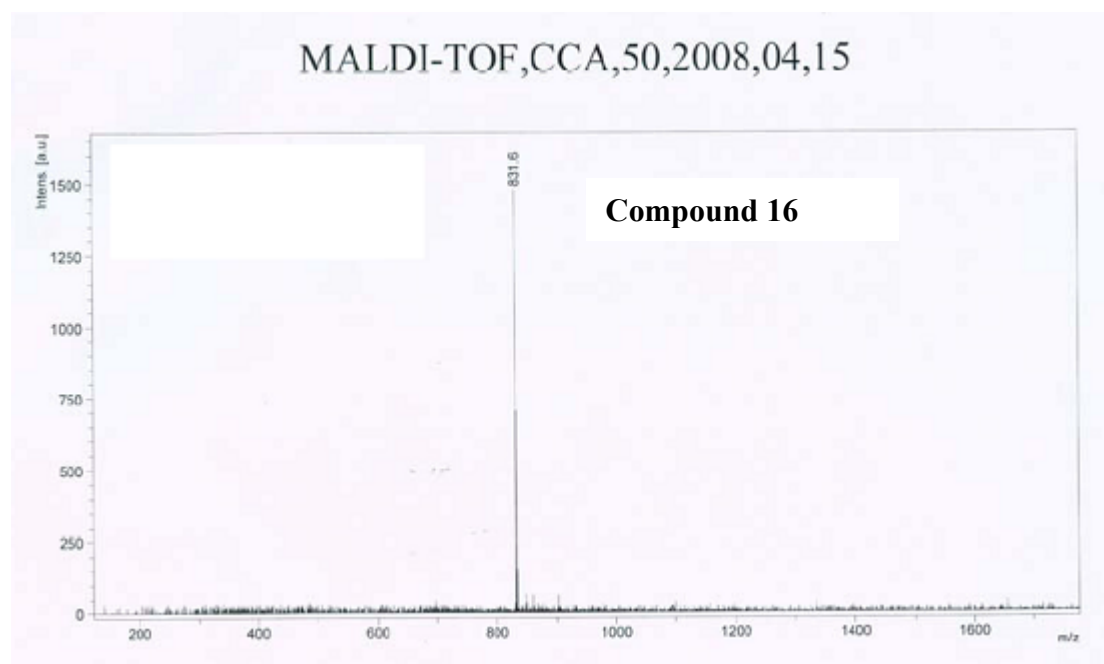



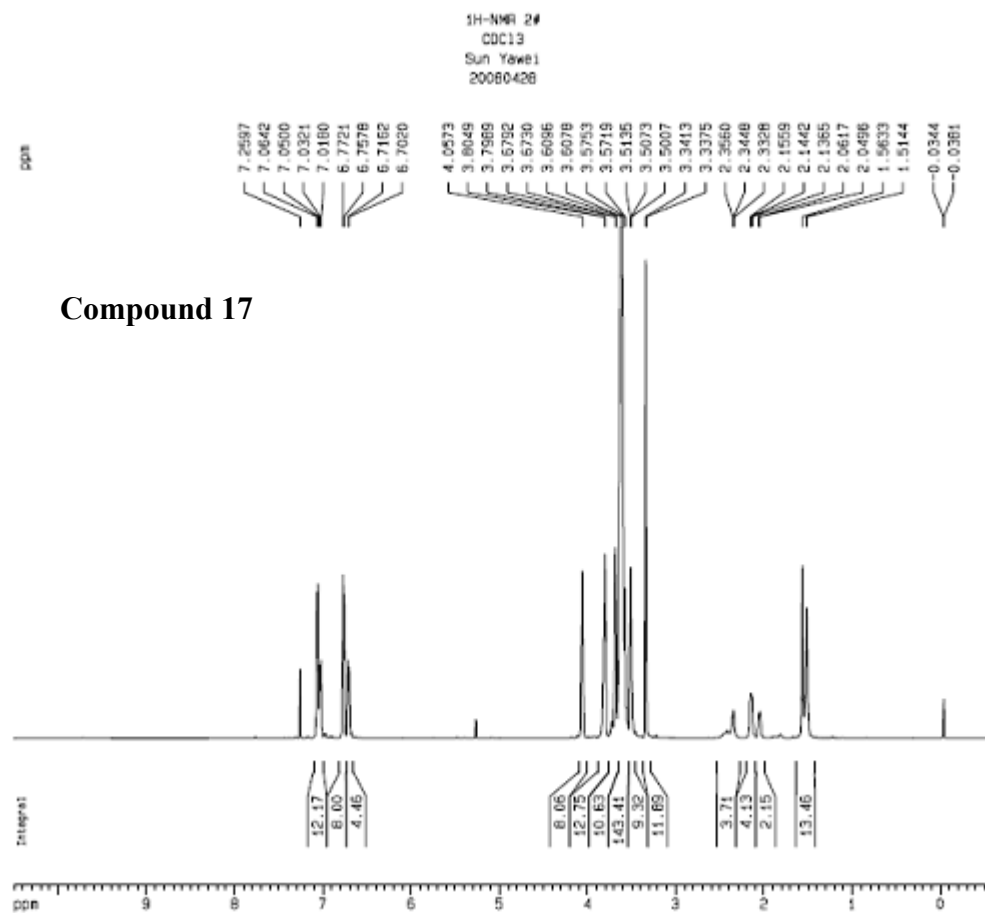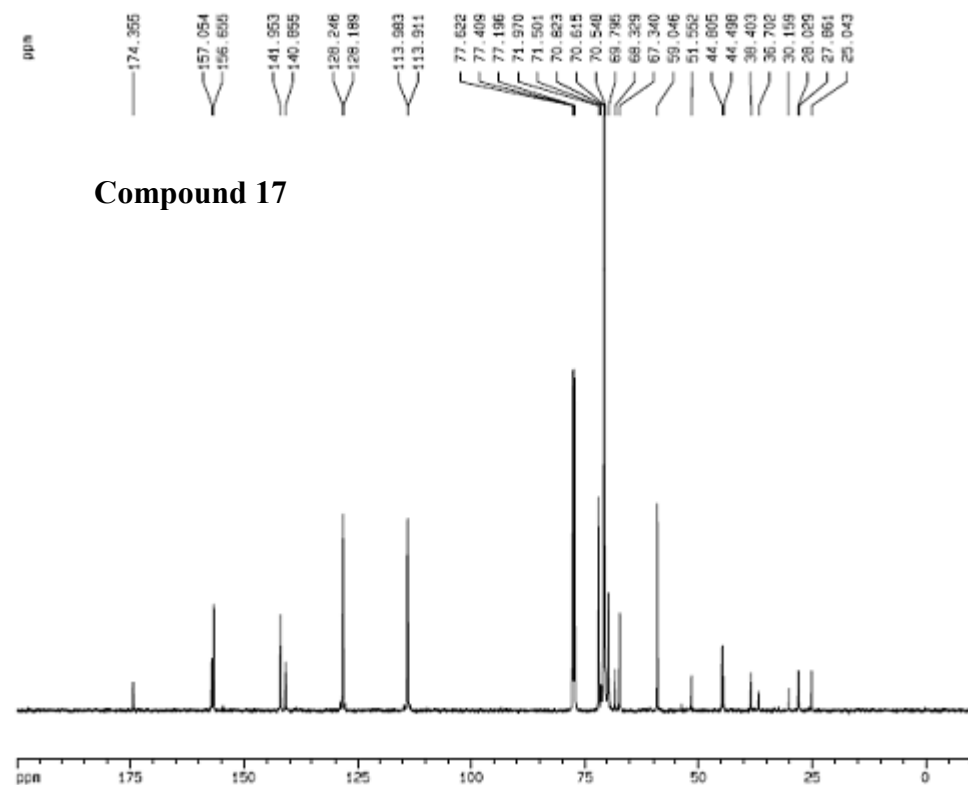

MALDI-TOF, CCA, 51, 2008, 04, 15

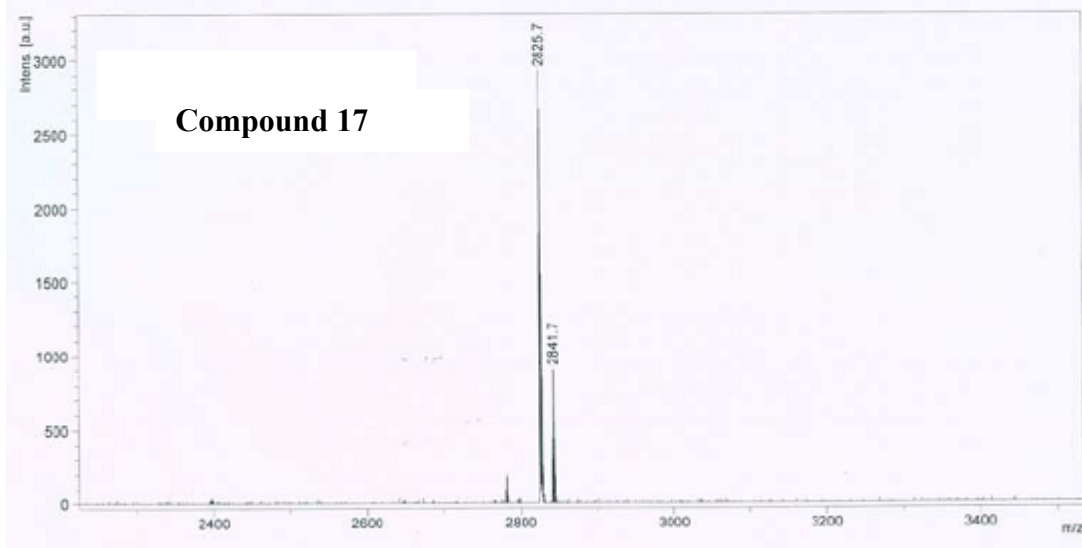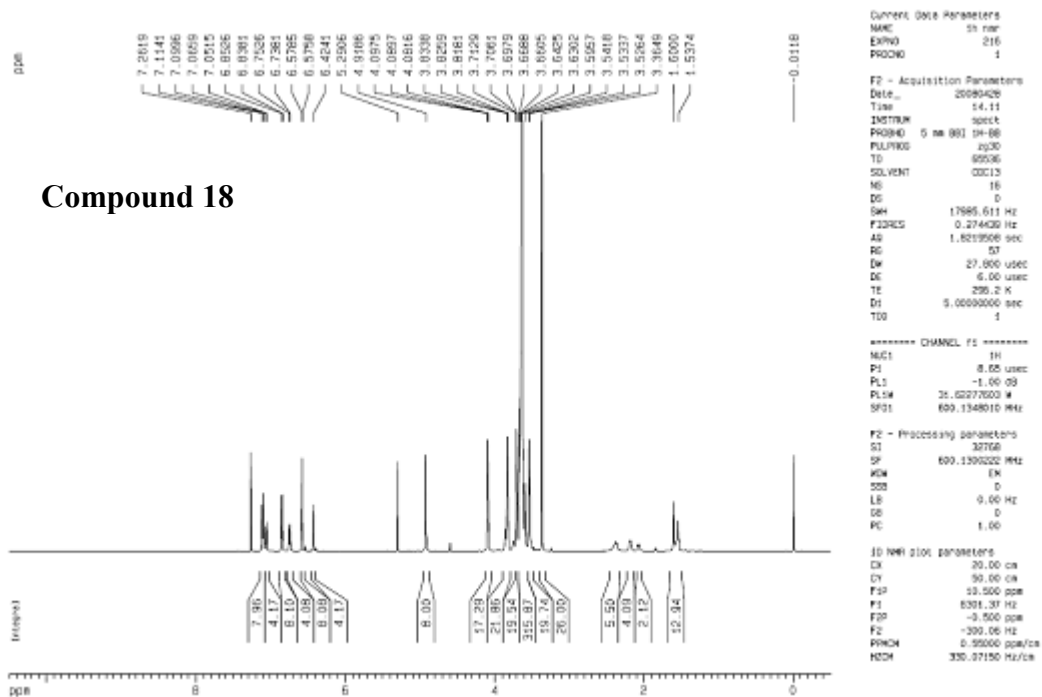

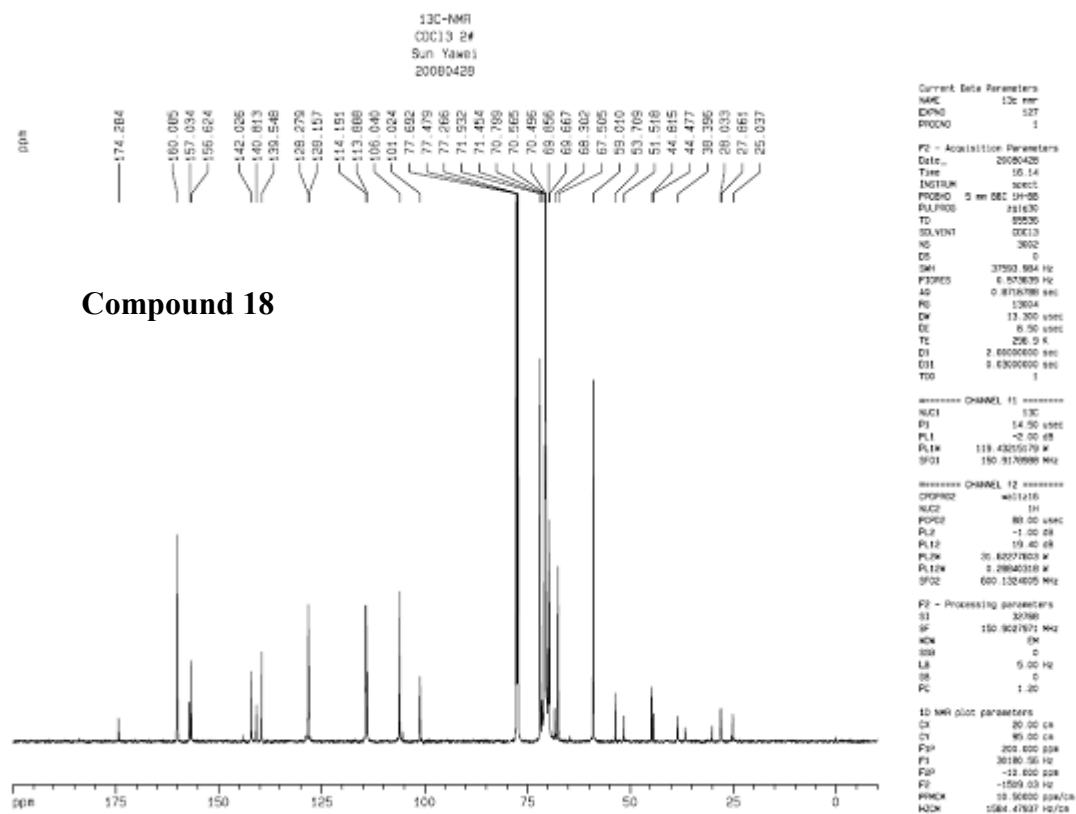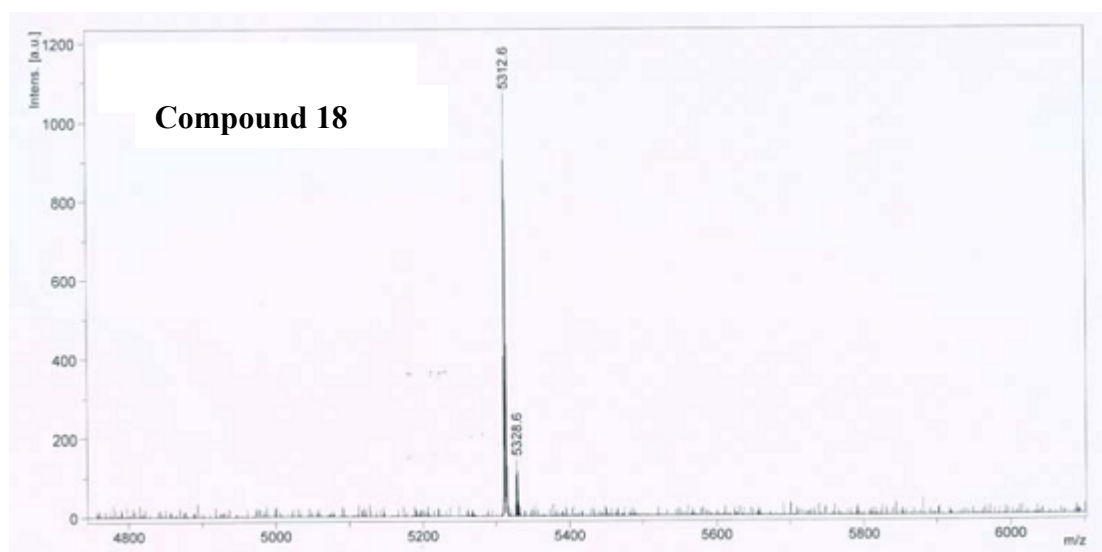

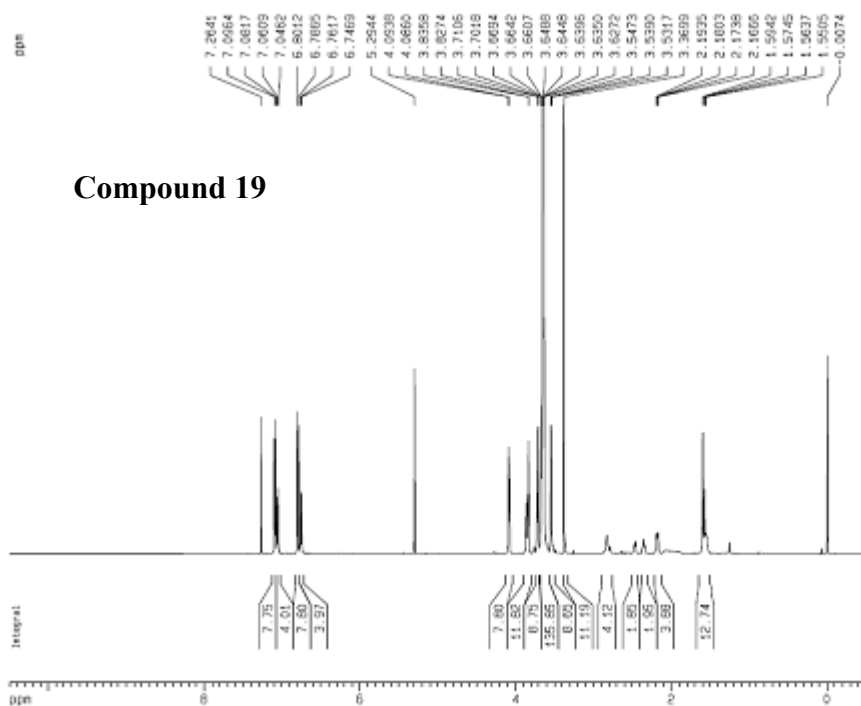

Current Data Parameters  
 NAME In nar  
 EXPNO 252  
 PROCNO 1

F2 - Acquisition Parameters  
 Date\_ 20080513  
 Time 11.10  
 INSTRUM spect  
 PROBR0 5 mm BBI 1H-88  
 PULPROG zg30  
 TD 65536  
 SOLVENT CECI3  
 NS 18  
 DS 0  
 SWH 17985.611 Hz  
 FIDRES 0.274439 Hz  
 AQ 1.8215000 sec  
 RG 27.800 usec  
 DE 6.00 usec  
 TE 295.3 K  
 D1 5.0000000 sec  
 T00 1

----- CHANNEL f1 -----  
 NUC1 1H  
 P1 8.60 usec  
 PL1 -1.00 dB  
 PL1W 35.52277603 W  
 SFO1 600.1348010 MHz

F2 - Processing parameters  
 SI 32768  
 SF 600.1300201 MHz  
 WDW EM  
 SSB 0  
 LB 0.00 Hz  
 GB 0  
 PC 1.00

1D NMR plot parameters  
 CX 20.00 cm  
 CY 50.00 cm  
 FIP 10.500 ppm  
 FI 6301.317 Hz  
 F2P -0.500 ppm  
 F2 -300.06 Hz  
 RMWD 0.95000 cm/cm  
 HZCM 330.07150 Hz/cm

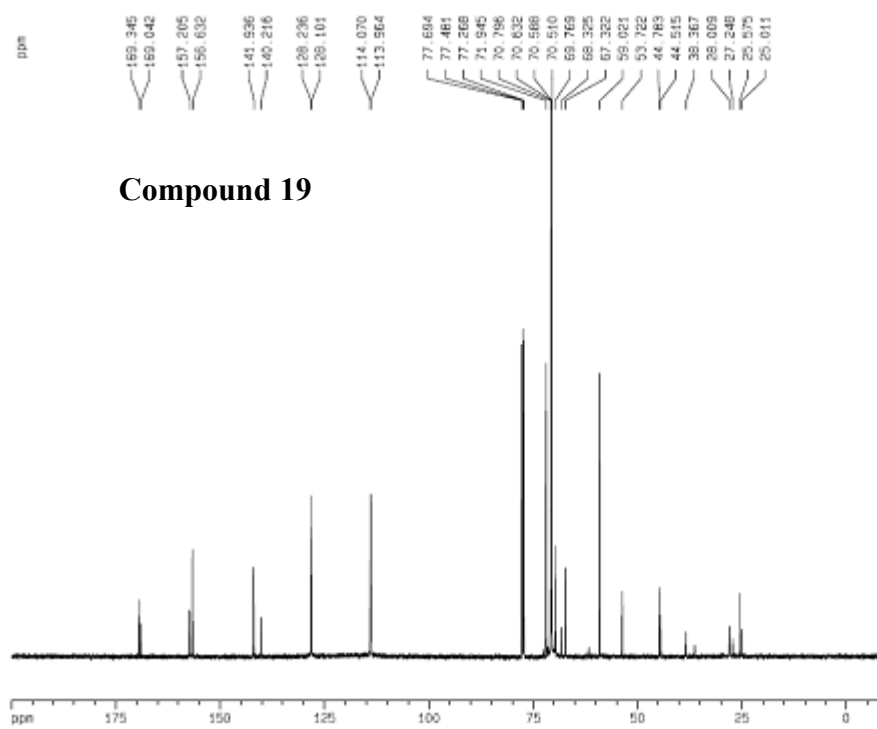

Current Data Parameters  
 NAME 13c nar  
 EXPNO 148  
 PROCNO 1

F2 - Acquisition Parameters  
 Date\_ 20080513  
 Time 11.50  
 INSTRUM spect  
 PROBR0 5 mm BBI 1H-88  
 PULPROG zgpg30  
 TD 65536  
 SOLVENT CECI3  
 NS 407  
 DS 0  
 SWH 37593.984 Hz  
 FIDRES 0.572639 Hz  
 AQ 0.8716708 sec  
 RG 3165.2  
 DE 13.360 usec  
 DI 8.50 usec  
 TE 295.2 K  
 D1 2.0000000 sec  
 D11 0.0300000 sec  
 T00 1

----- CHANNEL f1 -----  
 NUC1 13C  
 P1 14.50 usec  
 PL1 -3.00 dB  
 PL1W 110.62215179 W  
 SFO1 100.6278988 MHz

----- CHANNEL f2 -----  
 CHPROG waltz16  
 NUC2 1H  
 P2P22 68.00 usec  
 PL2 -1.00 dB  
 PL2W 19.40 dB  
 PL2W 21.62275023 W  
 PL2W 0.28848318 W  
 SFO2 600.1304005 MHz

F2 - Processing parameters  
 SI 32768  
 SF 100.6207931 MHz  
 WDW EM  
 SSB 0  
 LB 1.00 Hz  
 GB 0  
 PC 1.20

1D NMR plot parameters  
 CX 26.00 cm  
 CY 56.00 cm  
 FIP 200.000 ppm  
 FI 36106.56 Hz  
 F2P -10.000 ppm  
 F2 -1009.03 Hz  
 RMWD 16.58000 cm/cm  
 HZCM 1304.47037 Hz/cm

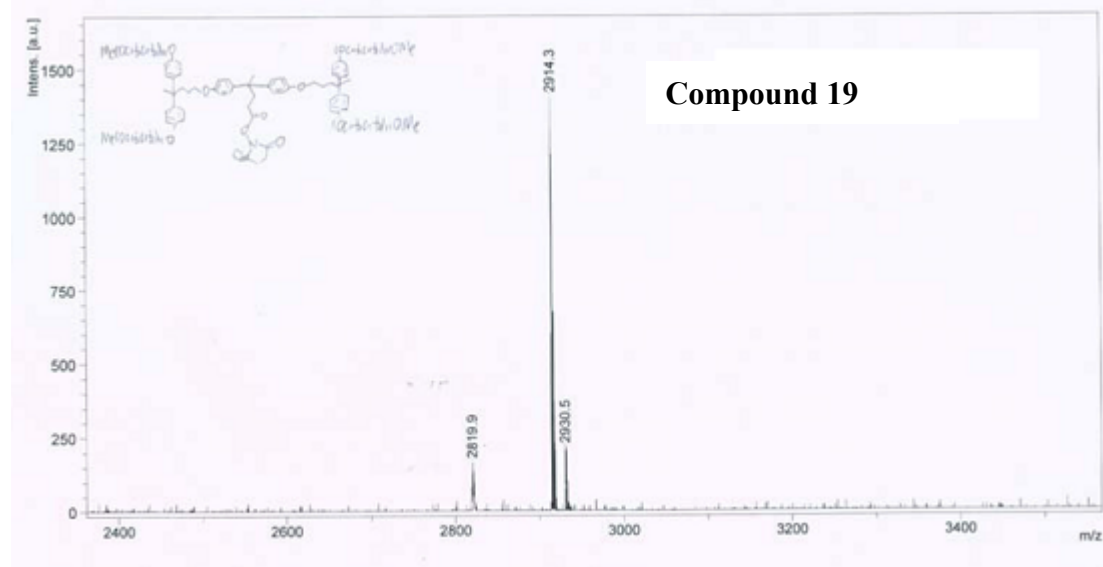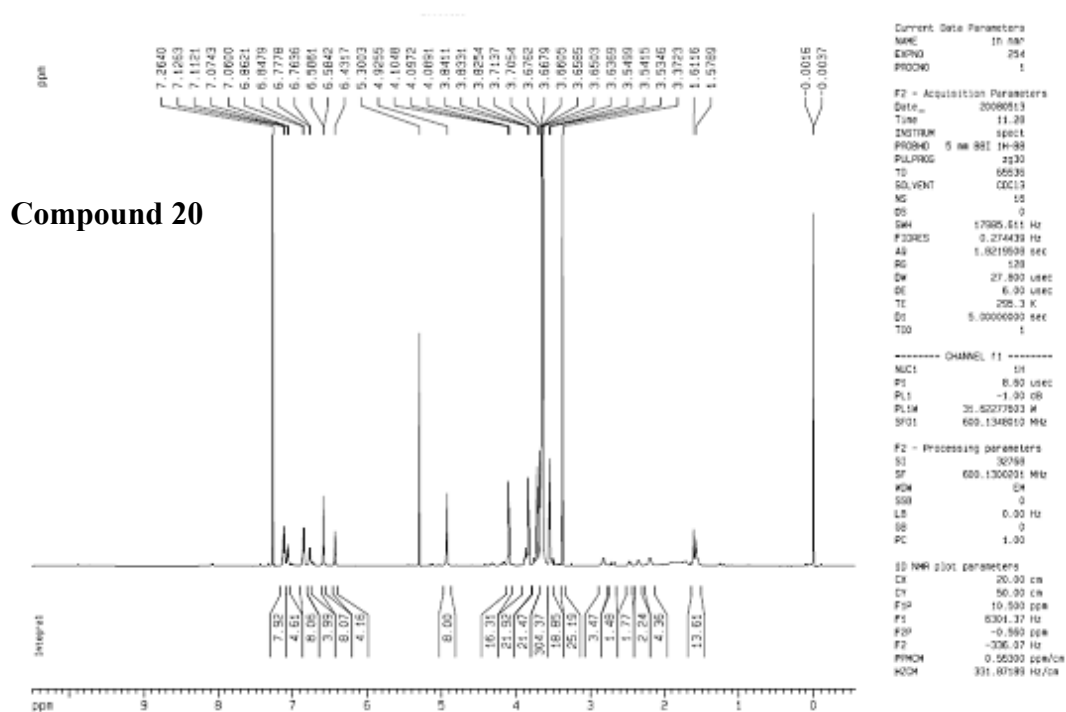

Supplement: c002377a.pdf [file c002377a.pdf]
